# Supplementary material for: Chargaff’s second parity rule lies at the origin of additive genetic interactions in quantitative traits to make omnigenic selection possible
Source: PeerJ journal article supplement (doi:10.7717/peerj.16671), 2023-12-14
Supplement: Supplementary_Materials_Tables_S1-2,_S4-5_Saparbaev.pdf [file Supplementary_Materials_Tables_S1-2%2C_S4-5_Saparbaev.pdf]

## Supporting Information

### Tables S1-2 and S4-5

## Chargaff's second parity rule lies at the origin of additive genetic interactions in quantitative traits to make omnigenetic selection possible

Bakhyt T. Matkarimov<sup>1,2,\*</sup> and Murat K. Saparbaev<sup>3,4,\*</sup>.

<sup>1</sup> *National Laboratory Astana, Nazarbayev University, Astana 010000, Kazakhstan.*

<sup>2</sup> *L.N.Gumilev Eurasian National University, Astana 010000, Kazakhstan.*

<sup>3</sup> *Groupe «Mechanisms of DNA Repair and Carcinogenesis», CNRS UMR9019, Université Paris-Saclay, Gustave Roussy Cancer Campus, F-94805 Villejuif Cedex, France.*

<sup>4</sup> *Al-Farabi Kazakh National University, Almaty, Kazakhstan.*

\*To whom correspondence should be addressed: M.K. Saparbaev. **E-mail:**

[murat.saparbaev@gustaveroussy.fr](mailto:murat.saparbaev@gustaveroussy.fr)

Correspondence may also be addressed to B.T. Matkarimov. **E-mail:**

[bmatkarimov@nu.edu.kz](mailto:bmatkarimov@nu.edu.kz)

**Supplementary Table S1.** Mutation spectra inferred from single nucleotide polymorphisms in human and mice populations.

| N°                | N X N | N Y N | X | Y | Total number of SNPs | Fraction | N'X'N' | N'Y'N' | X' | Y' | Total number of SNPs | Fraction | Difference (%) |
|-------------------|-------|-------|---|---|----------------------|----------|--------|--------|----|----|----------------------|----------|----------------|
| <b>Human SNPs</b> |       |       |   |   |                      |          |        |        |    |    |                      |          |                |
| 1                 | AGC   | ATC   | G | T | 312720               | 0.37     | GAT    | GCT    | A  | C  | 310244               | 0.36     | 0.79           |
| 2                 | CAA   | CTA   | A | T | 227826               | 0.27     | TAG    | TTG    | A  | T  | 229630               | 0.27     | 0.79           |
| 3                 | TCT   | TGT   | C | G | 902323               | 1.06     | ACA    | AGA    | C  | G  | 895602               | 1.05     | 0.74           |
| 4                 | CGT   | CTT   | G | T | 296420               | 0.35     | AAG    | ACG    | A  | C  | 294421               | 0.34     | 0.67           |
| 5                 | TAT   | TGT   | A | G | 3028959              | 3.54     | ACA    | ATA    | C  | T  | 3010412              | 3.52     | 0.61           |
| 6                 | AGT   | ATT   | G | T | 472582               | 0.55     | AAT    | ACT    | A  | C  | 469735               | 0.55     | 0.60           |
| 7                 | CCT   | CGT   | C | G | 379974               | 0.44     | ACG    | AGG    | C  | G  | 377686               | 0.44     | 0.60           |
| 8                 | CCC   | CGC   | C | G | 306967               | 0.36     | GCG    | GGG    | C  | G  | 305208               | 0.36     | 0.57           |
| 9                 | GAT   | GTT   | A | T | 427135               | 0.50     | AAC    | ATC    | A  | T  | 424703               | 0.50     | 0.57           |
| 10                | AAA   | ACA   | A | C | 887037               | 1.04     | TGT    | TTT    | G  | T  | 891542               | 1.04     | 0.51           |
| 11                | GAC   | GCC   | A | C | 377851               | 0.44     | GGC    | GTC    | G  | T  | 379592               | 0.44     | 0.46           |
| 12                | TGA   | TTA   | G | T | 494282               | 0.58     | TAA    | TCA    | A  | C  | 496509               | 0.58     | 0.45           |
| 13                | AAG   | ATG   | A | T | 441016               | 0.52     | CAT    | CTT    | A  | T  | 442585               | 0.52     | 0.35           |
| 14                | ACT   | ATT   | C | T | 2367625              | 2.77     | AAT    | AGT    | A  | G  | 2375298              | 2.78     | 0.32           |
| 15                | GAC   | GGC   | A | G | 1039990              | 1.22     | GCC    | GTC    | C  | T  | 1036758              | 1.21     | 0.31           |
| 16                | ACG   | ATG   | C | T | 3502135              | 4.10     | CAT    | CGT    | A  | G  | 3511739              | 4.11     | 0.27           |
| 17                | TCC   | TTC   | C | T | 1292114              | 1.51     | GAA    | GGA    | A  | G  | 1288797              | 1.51     | 0.26           |
| 18                | AAA   | AGA   | A | G | 1729945              | 2.02     | TCT    | TTT    | C  | T  | 1734336              | 2.03     | 0.25           |
| 19                | TAT   | TTT   | A | T | 544308               | 0.64     | AAA    | ATA    | A  | T  | 543030               | 0.64     | 0.23           |
| 20                | GAG   | GTG   | A | T | 287742               | 0.34     | CAC    | CTC    | A  | T  | 288408               | 0.34     | 0.23           |
| 21                | GAA   | GCA   | A | C | 512618               | 0.60     | TGC    | TTC    | G  | T  | 513797               | 0.60     | 0.23           |
| 22                | ACC   | ATC   | C | T | 1331428              | 1.56     | GAT    | GGT    | A  | G  | 1334457              | 1.56     | 0.23           |
| 23                | GCA   | GTA   | C | T | 1234387              | 1.44     | TAC    | TGC    | A  | G  | 1237171              | 1.45     | 0.23           |
| 24                | GAG   | GCG   | A | C | 240273               | 0.28     | CGC    | CTC    | G  | T  | 240790               | 0.28     | 0.21           |
| 25                | TCC   | TGC   | C | G | 444969               | 0.52     | GCA    | GGA    | C  | G  | 444029               | 0.52     | 0.21           |
| 26                | GGG   | GTG   | G | T | 467854               | 0.55     | CAC    | CCC    | A  | C  | 468761               | 0.55     | 0.19           |
| 27                | GGA   | GTA   | G | T | 367737               | 0.43     | TAC    | TCC    | A  | C  | 368387               | 0.43     | 0.18           |
| 28                | TGG   | TTG   | G | T | 543832               | 0.64     | CAA    | CCA    | A  | C  | 542895               | 0.64     | 0.17           |
| 29                | CAA   | CGA   | A | G | 1798724              | 2.10     | TCG    | TTG    | C  | T  | 1801266              | 2.11     | 0.14           |
| 30                | CGA   | CTA   | G | T | 160741               | 0.19     | TAG    | TCG    | A  | C  | 160957               | 0.19     | 0.13           |
| 31                | TCG   | TGG   | C | G | 280491               | 0.33     | CCA    | CGA    | C  | G  | 280147               | 0.33     | 0.12           |
| 32                | GCT   | GTT   | C | T | 1378880              | 1.61     | AAC    | AGC    | A  | G  | 1380364              | 1.62     | 0.11           |
| 33                | CAG   | CCG   | A | C | 292541               | 0.34     | CGG    | CTG    | G  | T  | 292773               | 0.34     | 0.08           |
| 34                | TAC   | TTC   | A | T | 230424               | 0.27     | GAA    | GTA    | A  | T  | 230244               | 0.27     | 0.08           |

|                   |       |       |   |   |                      |          |        |        |    |    |                      |          |                |
|-------------------|-------|-------|---|---|----------------------|----------|--------|--------|----|----|----------------------|----------|----------------|
| 35                | AGA   | ATA   | G | T | 604514               | 0.71     | TAT    | TCT    | A  | C  | 604874               | 0.71     | 0.06           |
| 36                | CCG   | CTG   | C | T | 2588225              | 3.03     | CAG    | CGG    | A  | G  | 2589637              | 3.03     | 0.05           |
| 37                | GGT   | GTT   | G | T | 611030               | 0.71     | AAC    | ACC    | A  | C  | 611362               | 0.72     | 0.05           |
| 38                | AAG   | AGG   | A | G | 1664646              | 1.95     | CCT    | CTT    | C  | T  | 1663799              | 1.95     | 0.05           |
| 39                | CAT   | CCT   | A | C | 481839               | 0.56     | AGG    | ATG    | G  | T  | 482018               | 0.56     | 0.04           |
| 40                | CCA   | CTA   | C | T | 1383378              | 1.62     | TAG    | TGG    | A  | G  | 1383081              | 1.62     | 0.02           |
| 41                | GCT   | GGT   | C | G | 418689               | 0.49     | ACC    | AGC    | C  | G  | 418602               | 0.49     | 0.02           |
| 42                | GAG   | GGG   | A | G | 1195336              | 1.40     | CCC    | CTC    | C  | T  | 1195523              | 1.40     | 0.02           |
| 43                | GCG   | GTG   | C | T | 2008008              | 2.35     | CAC    | CGC    | A  | G  | 2008195              | 2.35     | 0.01           |
| 44                | TAA   | TGA   | A | G | 1448254              | 1.69     | TCA    | TTA    | C  | T  | 1448196              | 1.69     | 0.00           |
| 45                | TAA   | TTA   | A | T | 532422               | 0.62     |        |        |    |    |                      |          |                |
| 46                | CAG   | CTG   | A | T | 343352               | 0.40     |        |        |    |    |                      |          |                |
| 47                | GCC   | GGC   | C | G | 364797               | 0.43     |        |        |    |    |                      |          |                |
| 48                | ACT   | AGT   | C | G | 690362               | 0.81     |        |        |    |    |                      |          |                |
| 49                | CCG   | CGG   | C | G | 135675               | 0.16     |        |        |    |    |                      |          |                |
| 50                | AAT   | ATT   | A | T | 533699               | 0.62     |        |        |    |    |                      |          |                |
| 51                | TCA   | TGA   | C | G | 596062               | 0.70     |        |        |    |    |                      |          |                |
| 52                | GAC   | GTC   | A | T | 256117               | 0.30     |        |        |    |    |                      |          |                |
| N°                | N X N | N Y N | X | Y | Total number of SNPs | Fraction | N'X'N' | N'Y'N' | X' | Y' | Total number of SNPs | Fraction | Difference (%) |
| <b>Mouse SNPs</b> |       |       |   |   |                      |          |        |        |    |    |                      |          |                |
| 1                 | CGA   | CTA   | G | T | 38698                | 0.26     | TAG    | TCG    | A  | C  | 38235                | 0.25     | 1.20           |
| 2                 | AAG   | ATG   | A | T | 88927                | 0.59     | CAT    | CTT    | A  | T  | 89884                | 0.59     | 1.06           |
| 3                 | CCC   | CGC   | C | G | 29680                | 0.20     | GCG    | GGG    | C  | G  | 29385                | 0.19     | 0.99           |
| 4                 | CCT   | CGT   | C | G | 48777                | 0.32     | ACG    | AGG    | C  | G  | 49266                | 0.32     | 0.99           |
| 5                 | AGA   | ATA   | G | T | 107141               | 0.71     | TAT    | TCT    | A  | C  | 108135               | 0.71     | 0.92           |
| 6                 | GAC   | GCC   | A | C | 57560                | 0.38     | GGC    | GTC    | G  | T  | 57041                | 0.38     | 0.90           |
| 7                 | TGA   | TTA   | G | T | 86691                | 0.57     | TAA    | TCA    | A  | C  | 87432                | 0.58     | 0.85           |
| 8                 | GCT   | GTT   | C | T | 323720               | 2.14     | AAC    | AGC    | A  | G  | 326448               | 2.15     | 0.84           |
| 9                 | AGC   | ATC   | G | T | 85493                | 0.56     | GAT    | GCT    | A  | C  | 84799                | 0.56     | 0.81           |
| 10                | CAA   | CTA   | A | T | 54492                | 0.36     | TAG    | TTG    | A  | T  | 54163                | 0.36     | 0.60           |
| 11                | TCG   | TGG   | C | G | 38824                | 0.26     | CCA    | CGA    | C  | G  | 39042                | 0.26     | 0.56           |
| 12                | GCT   | GGT   | C | G | 65256                | 0.43     | ACC    | AGC    | C  | G  | 64903                | 0.43     | 0.54           |
| 13                | TGG   | TTG   | G | T | 88219                | 0.58     | CAA    | CCA    | A  | C  | 88685                | 0.58     | 0.53           |
| 14                | GGA   | GTA   | G | T | 66022                | 0.44     | TAC    | TCC    | A  | C  | 66361                | 0.44     | 0.51           |
| 15                | TCT   | TGT   | C | G | 120710               | 0.80     | ACA    | AGA    | C  | G  | 121326               | 0.80     | 0.51           |
| 16                | TAC   | TTC   | A | T | 60192                | 0.40     | GAA    | GTA    | A  | T  | 60497                | 0.40     | 0.50           |
| 17                | AAA   | ACA   | A | C | 151052               | 1.00     | TGT    | TTT    | G  | T  | 150333               | 0.99     | 0.48           |
| 18                | CGT   | CTT   | G | T | 75731                | 0.50     | AAG    | ACG    | A  | C  | 75412                | 0.50     | 0.42           |

|    |     |     |   |   |        |      |     |     |   |   |        |      |      |
|----|-----|-----|---|---|--------|------|-----|-----|---|---|--------|------|------|
| 19 | CCG | CTG | C | T | 348208 | 2.30 | CAG | CGG | A | G | 349621 | 2.31 | 0.40 |
| 20 | GAG | GCG | A | C | 50929  | 0.34 | CGC | CTC | G | T | 50724  | 0.33 | 0.40 |
| 21 | CAG | CCG | A | C | 56636  | 0.37 | CGG | CTG | G | T | 56410  | 0.37 | 0.40 |
| 22 | GAT | GTT | A | T | 63675  | 0.42 | AAC | ATC | A | T | 63432  | 0.42 | 0.38 |
| 23 | ACG | ATG | C | T | 480989 | 3.17 | CAT | CGT | A | G | 482775 | 3.18 | 0.37 |
| 24 | GGG | GTG | G | T | 74901  | 0.49 | CAC | CCC | A | C | 74624  | 0.49 | 0.37 |
| 25 | GCG | GTG | C | T | 276960 | 1.83 | CAC | CGC | A | G | 277835 | 1.83 | 0.31 |
| 26 | GAG | GGG | A | G | 225182 | 1.49 | CCC | CTC | C | T | 224605 | 1.48 | 0.26 |
| 27 | GAA | GCA | A | C | 95996  | 0.63 | TGC | TTC | G | T | 95759  | 0.63 | 0.25 |
| 28 | TCC | TGC | C | G | 56075  | 0.37 | GCA | GGA | C | G | 55960  | 0.37 | 0.21 |
| 29 | TCC | TTC | C | T | 351509 | 2.32 | GAA | GGA | A | G | 352103 | 2.32 | 0.17 |
| 30 | AAA | AGA | A | G | 362257 | 2.39 | TCT | TTT | C | T | 361808 | 2.39 | 0.12 |
| 31 | GAG | GTG | A | T | 73085  | 0.48 | CAC | CTC | A | T | 72996  | 0.48 | 0.12 |
| 32 | CCA | CTA | C | T | 283060 | 1.87 | TAG | TGG | A | G | 282755 | 1.87 | 0.11 |
| 33 | ACC | ATC | C | T | 262283 | 1.73 | GAT | GGT | A | G | 262546 | 1.73 | 0.10 |
| 34 | CAT | CCT | A | C | 83574  | 0.55 | AGG | ATG | G | T | 83647  | 0.55 | 0.09 |
| 35 | AGT | ATT | G | T | 100114 | 0.66 | AAT | ACT | A | C | 100033 | 0.66 | 0.08 |
| 36 | GGT | GTT | G | T | 95675  | 0.63 | AAC | ACC | A | C | 95744  | 0.63 | 0.07 |
| 37 | ACT | ATT | C | T | 384248 | 2.53 | AAT | AGT | A | G | 384516 | 2.54 | 0.07 |
| 38 | TAA | TGA | A | G | 285259 | 1.88 | TCA | TTA | C | T | 285425 | 1.88 | 0.06 |
| 39 | GAC | GGC | A | G | 253253 | 1.67 | GCC | GTC | C | T | 253112 | 1.67 | 0.06 |
| 40 | TAT | TGT | A | G | 477219 | 3.15 | ACA | ATA | C | T | 477431 | 3.15 | 0.04 |
| 41 | GCA | GTA | C | T | 255518 | 1.69 | TAC | TGC | A | G | 255481 | 1.69 | 0.01 |
| 42 | TAT | TTT | A | T | 103335 | 0.68 | AAA | ATA | A | T | 103323 | 0.68 | 0.01 |
| 43 | AAG | AGG | A | G | 299963 | 1.98 | CCT | CTT | C | T | 299979 | 1.98 | 0.01 |
| 44 | CAA | CGA | A | G | 264331 | 1.74 | TCG | TTG | C | T | 264323 | 1.74 | 0.00 |
| 45 | TAA | TTA | A | T | 133002 | 0.88 |     |     |   |   |        |      |      |
| 46 | CAG | CTG | A | T | 84745  | 0.56 |     |     |   |   |        |      |      |
| 47 | GCC | GGC | C | G | 49385  | 0.33 |     |     |   |   |        |      |      |
| 48 | ACT | AGT | C | G | 107564 | 0.71 |     |     |   |   |        |      |      |
| 49 | CCG | CGG | C | G | 34929  | 0.23 |     |     |   |   |        |      |      |
| 50 | AAT | ATT | A | T | 122244 | 0.81 |     |     |   |   |        |      |      |
| 51 | TCA | TGA | C | G | 65934  | 0.43 |     |     |   |   |        |      |      |
| 52 | GAC | GTC | A | T | 52841  | 0.35 |     |     |   |   |        |      |      |

**Supplementary Table S2.** Mutation spectra inferred from single nucleotide insertion or deletion (indels) in the genomes in human populations.

| N°                                                                                                            | NΔN | NXN | Δ | X | Total number of indels | Fraction | N'ΔN' | N'X'N' | Δ | X' | Total number of indels | Fraction | Difference (%) |
|---------------------------------------------------------------------------------------------------------------|-----|-----|---|---|------------------------|----------|-------|--------|---|----|------------------------|----------|----------------|
| Triplets with sequence context in which a base corresponding to indel is different from the neighboring base. |     |     |   |   |                        |          |       |        |   |    |                        |          |                |
| 1                                                                                                             | C-G | CTG | - | T | 31093                  | 1.74     | C-G   | CAG    | - | A  | 31132                  | 1.75     | 0.13           |
| 2                                                                                                             | G-C | GTC | - | T | 6049                   | 0.34     | G-C   | GAC    | - | A  | 6092                   | 0.34     | 0.71           |
| 3                                                                                                             | T-C | TGC | - | G | 11496                  | 0.64     | G-A   | GCA    | - | C  | 11346                  | 0.64     | 1.30           |
| 4                                                                                                             | T-T | TAT | - | A | 33846                  | 1.90     | A-A   | ATA    | - | T  | 33349                  | 1.87     | 1.47           |
| 5                                                                                                             | T-T | TGT | - | G | 44135                  | 2.48     | A-A   | ACA    | - | C  | 43138                  | 2.42     | 2.26           |
| 6                                                                                                             | T-C | TAC | - | A | 7640                   | 0.43     | G-A   | GTA    | - | T  | 7449                   | 0.42     | 2.50           |
| 7                                                                                                             | C-A | CTA | - | T | 16203                  | 0.91     | T-G   | TAG    | - | A  | 15787                  | 0.89     | 2.57           |
| 8                                                                                                             | A-C | ATC | - | T | 11841                  | 0.66     | G-T   | GAT    | - | A  | 11511                  | 0.65     | 2.79           |
| 9                                                                                                             | A-T | AGT | - | G | 22001                  | 1.23     | A-T   | ACT    | - | C  | 22719                  | 1.27     | 3.16           |
| 10                                                                                                            | A-G | ATG | - | T | 17041                  | 0.96     | C-T   | CAT    | - | A  | 16374                  | 0.92     | 3.91           |
| 11                                                                                                            | G-T | GCT | - | C | 15314                  | 0.86     | A-C   | AGC    | - | G  | 14649                  | 0.82     | 4.34           |
| 12                                                                                                            | A-A | AGA | - | G | 36802                  | 2.06     | T-T   | TCT    | - | C  | 38617                  | 2.17     | 4.70           |
| 13                                                                                                            | G-G | GAG | - | A | 16611                  | 0.93     | C-C   | CTC    | - | T  | 17504                  | 0.98     | 5.10           |
| 14                                                                                                            | C-C | CGC | - | G | 2900                   | 0.16     | G-G   | GCG    | - | C  | 3063                   | 0.17     | 5.32           |
| 15                                                                                                            | C-C | CAC | - | A | 13485                  | 0.76     | G-G   | GTG    | - | T  | 12680                  | 0.71     | 5.97           |
| 16                                                                                                            | A-G | ACG | - | C | 4610                   | 0.26     | C-T   | CGT    | - | G  | 4249                   | 0.24     | 7.83           |
| 17                                                                                                            | T-G | TCG | - | C | 2880                   | 0.16     | C-A   | CGA    | - | G  | 2603                   | 0.15     | 9.62           |
| 18                                                                                                            | T-A | TGA | - | G | 16897                  | 0.95     | T-A   | TCA    | - | C  | 19855                  | 1.11     | 14.90          |
| Triplets with sequence context in which a base corresponding to indel is the same as neighboring base.        |     |     |   |   |                        |          |       |        |   |    |                        |          |                |
| 19                                                                                                            | A-A | AAA | - | A | 19326                  | 1.08     | T-T   | TTT    | - | T  | 19540                  | 1.10     | 1.10           |
| 20                                                                                                            | G-G | GGG | - | G | 1144                   | 0.06     | C-C   | CCC    | - | C  | 1124                   | 0.06     | 1.75           |
| 21                                                                                                            | T-G | TTG | - | T | 11150                  | 0.63     | C-A   | CAA    | - | A  | 123998                 | 6.95     | 91.01          |
| 22                                                                                                            | C-T | CTT | - | T | 138611                 | 7.77     | A-G   | AAG    | - | A  | 11140                  | 0.62     | 91.96          |
| 23                                                                                                            | A-C | AAC | - | A | 4327                   | 0.24     | G-T   | GTT    | - | T  | 79624                  | 4.47     | 94.57          |
| 24                                                                                                            | T-A | TTA | - | T | 6518                   | 0.37     | T-A   | TAA    | - | A  | 133014                 | 7.46     | 95.10          |
| 25                                                                                                            | A-T | ATT | - | T | 155454                 | 8.72     | A-T   | AAT    | - | A  | 7175                   | 0.40     | 95.38          |
| 26                                                                                                            | T-C | TTC | - | T | 5072                   | 0.28     | G-A   | GAA    | - | A  | 112956                 | 6.34     | 95.51          |
| 27                                                                                                            | C-G | CCG | - | C | 337                    | 0.02     | C-G   | CGG    | - | G  | 14700                  | 0.82     | 97.71          |
| 28                                                                                                            | G-T | GGT | - | G | 1290                   | 0.07     | A-C   | ACC    | - | C  | 58855                  | 3.30     | 97.81          |
| 29                                                                                                            | T-C | TCC | - | C | 62091                  | 3.48     | G-A   | GGA    | - | G  | 1287                   | 0.07     | 97.93          |
| 30                                                                                                            | T-G | TGG | - | G | 73594                  | 4.13     | C-A   | CCA    | - | C  | 1510                   | 0.08     | 97.95          |
| 31                                                                                                            | C-T | CCT | - | C | 1435                   | 0.08     | A-G   | AGG    | - | G  | 72608                  | 4.07     | 98.02          |
| 32                                                                                                            | G-C | GCC | - | C | 41325                  | 2.32     | G-C   | GGC    | - | G  | 750                    | 0.04     | 98.19          |

## Supplementary Materials Table S4

*Analysis of the nucleotide composition at different codon positions in CDSs of human and mouse by taking in account orientation of the genes relative to reference strand*

We processed CDS data from the curated database, CCDS for human/mouse [33] (*Supplementary Materials, Table S3*). We computed statistics/counts for nucleotide sequences of the length 1 (single nucleotides), 2 (dinucleotides) and 3 (trinucleotides) started at the 1<sup>st</sup>, 2<sup>nd</sup> and 3<sup>rd</sup> codon positions for two cases: properly for CDS sequences and for the CDS sequences read from a single strand, e.g. reverse complementary CDS for the portion of proteins, located on different strand. For the reverse complementary CDSs we setup 1<sup>st</sup>, 2<sup>nd</sup> and 3<sup>rd</sup> codon positions relative to the 5' → 3' DNA stand orientation. In addition, we compute the total count as a sum of counts for all codon positions. To compare statistical counts for nucleotide sequences and their reverse complementary counterparts we have used percentage difference formula  $200 \cdot (A-B)/(A+B)$ . In a single row of the supplementary data files we show the name of the sequence (SEQ), its counts at the first (P1), second (P2), third (P3) codon positions and total count (TOTAL); then the same data for reverse complementary sequence; then percentage difference for 1<sup>st</sup>, 2<sup>nd</sup> and 3<sup>rd</sup> codon positions and total between sequence and it reverse complementary (for more details see *Supplementary Materials, Table S4*).

**Mononucleotide statistics and comparison with reverse-complementary counterpart at the three codon positions for CDS data of the Consensus coding sequence (CCDS) database**

**Homo sapiens, CCDS v.24, CDS counts, strand orientation not taken in account (strand-independent case)**

| SEQ | P1      | P2      | P3      | TOTAL    | RC SE | P1      | P2      | P3      | TOTAL    | diff P1   | diff P2   | diff P3   | diff      |
|-----|---------|---------|---------|----------|-------|---------|---------|---------|----------|-----------|-----------|-----------|-----------|
| A   | 5606547 | 6574757 | 4173307 | 16354611 | T     | 3510236 | 5374049 | 4715804 | 13600089 | 45.98795  | 20.09754  | -12.20588 | 18.39125  |
| C   | 5093123 | 4885610 | 5983004 | 15961737 | G     | 6521808 | 3897298 | 5859599 | 16278705 | -24.60083 | 22.50535  | 2.084086  | -1.966276 |
| G   | 6521808 | 3897298 | 5859599 | 16278705 | C     | 5093123 | 4885610 | 5983004 | 15961737 | 24.60083  | -22.50535 | -2.084086 | 1.966276  |
| T   | 3510236 | 5374049 | 4715804 | 13600089 | A     | 5606547 | 6574757 | 4173307 | 16354611 | -45.98795 | -20.09754 | 12.20588  | -18.39125 |

**Homo sapiens, CCDS v.24, Watson (+) strand counts, CDS on Crick (-) strand reverse complemented (strand-dependent case)**

| SEQ | P1      | P2      | P3      | TOTAL    | RC SE | P1      | P2      | P3      | TOTAL    | diff P1   | diff P2   | diff P3   | diff      |
|-----|---------|---------|---------|----------|-------|---------|---------|---------|----------|-----------|-----------|-----------|-----------|
| A   | 4569047 | 5977430 | 4436912 | 14983389 | T     | 4547736 | 5971376 | 4452199 | 14971311 | 0.467511  | 0.101332  | -0.343949 | 0.080642  |
| C   | 5802969 | 4403887 | 5932901 | 16139757 | G     | 5811962 | 4379021 | 5909702 | 16100685 | -0.154852 | 0.566236  | 0.391789  | 0.242379  |
| G   | 5811962 | 4379021 | 5909702 | 16100685 | C     | 5802969 | 4403887 | 5932901 | 16139757 | 0.154852  | -0.566236 | -0.391789 | -0.242379 |
| T   | 4547736 | 5971376 | 4452199 | 14971311 | A     | 4569047 | 5977430 | 4436912 | 14983389 | -0.467511 | -0.101332 | 0.343949  | -0.080642 |

**Mus musculus, CCDS v.23, CDS counts, strand orientation not taken in account (strand-independent case)**

| SEQ | P1      | P2      | P3      | TOTAL    | RC SE | P1      | P2      | P3      | TOTAL    | diff P1   | diff P2   | diff P3   | diff      |
|-----|---------|---------|---------|----------|-------|---------|---------|---------|----------|-----------|-----------|-----------|-----------|
| A   | 4067939 | 4694120 | 2919241 | 11681300 | T     | 2583958 | 3967677 | 3392355 | 9943990  | 44.61828  | 16.77349  | -14.9919  | 16.06739  |
| C   | 3690518 | 3528000 | 4425972 | 11644490 | G     | 4670524 | 2823142 | 4275371 | 11769037 | -23.4422  | 22.19626  | 3.461558  | -1.063889 |
| G   | 4670524 | 2823142 | 4275371 | 11769037 | C     | 3690518 | 3528000 | 4425972 | 11644490 | 23.4422   | -22.19626 | -3.461558 | 1.063889  |
| T   | 2583958 | 3967677 | 3392355 | 9943990  | A     | 4067939 | 4694120 | 2919241 | 11681300 | -44.61828 | -16.77349 | 14.9919   | -16.06739 |

**Mus musculus, CCDS v.23, Watson (+) strand counts, CDS on Crick (-) strand reverse complemented (strand-dependent case)**

| SEQ | P1      | P2      | P3      | TOTAL    | RC SE | P1      | P2      | P3      | TOTAL    | diff P1   | diff P2   | diff P3   | diff      |
|-----|---------|---------|---------|----------|-------|---------|---------|---------|----------|-----------|-----------|-----------|-----------|
| A   | 3329925 | 4342707 | 3158599 | 10831231 | T     | 3321972 | 4319090 | 3152997 | 10794059 | 0.23912   | 0.545314  | 0.177515  | 0.343783  |
| C   | 4179281 | 3176278 | 4341371 | 11696930 | G     | 4181761 | 3174864 | 4359972 | 11716597 | -0.059323 | 0.044527  | -0.427543 | -0.167997 |
| G   | 4181761 | 3174864 | 4359972 | 11716597 | C     | 4179281 | 3176278 | 4341371 | 11696930 | 0.059323  | -0.044527 | 0.427543  | 0.167997  |
| T   | 3321972 | 4319090 | 3152997 | 10794059 | A     | 3329925 | 4342707 | 3158599 | 10831231 | -0.23912  | -0.545314 | -0.177515 | -0.343783 |

**Dinucleotide statistics and comparison with reverse-complementary counterpart at the three codon positions for CDS data of the Consensus coding sequence (CCDS) database**

**Homo sapiens, CCDS v.24, CDS counts, strand orientation not taken in account (strand-independent case)**

| SEQ | P1      | P2      | P3      | TOTAL   | RC SEQ | P1      | P2      | P3      | TOTAL   | diff P1   | diff P2   | diff P3   | diff      |
|-----|---------|---------|---------|---------|--------|---------|---------|---------|---------|-----------|-----------|-----------|-----------|
| AA  | 1964658 | 1482979 | 1109002 | 4556639 | TT     | 1180438 | 1207693 | 785147  | 3173278 | 49.86938  | 20.46225  | 34.1953   | 35.79239  |
| AC  | 1107286 | 1514092 | 819751  | 3441129 | GT     | 1238739 | 799200  | 775597  | 2813536 | -11.20644 | 61.80733  | 5.535344  | 20.068    |
| AG  | 1179410 | 2244374 | 1626701 | 5050485 | CT     | 1599679 | 1375599 | 1359377 | 4334655 | -30.24509 | 47.99898  | 17.90469  | 15.25454  |
| AT  | 1355193 | 1333312 | 590110  | 3278615 | AT     | 1355193 | 1333312 | 590110  | 3278615 | 0         | 0         | 0         | 0         |
| CA  | 1532987 | 1305504 | 2123618 | 4962109 | TG     | 714891  | 2067071 | 2079443 | 4861405 | 72.78829  | -45.16235 | 2.102039  | 2.050264  |
| CC  | 1295246 | 1705689 | 1717871 | 4718806 | GG     | 1337786 | 1049336 | 2033520 | 4420642 | -3.231256 | 47.6477   | -16.82837 | 6.52477   |
| CG  | 665211  | 498818  | 782138  | 1946167 | CG     | 665211  | 498818  | 782138  | 1946167 | 0         | 0         | 0         | 0         |
| CT  | 1599679 | 1375599 | 1359377 | 4334655 | AG     | 1179410 | 2244374 | 1626701 | 5050485 | 30.24509  | -47.99898 | -17.90469 | -15.25454 |
| GA  | 2509894 | 755708  | 1528223 | 4793825 | TC     | 1047689 | 1470169 | 1041029 | 3558887 | 82.20216  | -64.19591 | 37.92497  | 29.56975  |
| GC  | 1435389 | 1293054 | 1514428 | 4242871 | GC     | 1435389 | 1293054 | 1514428 | 4242871 | 0         | 0         | 0         | 0         |
| GG  | 1337786 | 1049336 | 2033520 | 4420642 | CC     | 1295246 | 1705689 | 1717871 | 4718806 | 3.231256  | -47.6477  | 16.82837  | -6.52477  |
| GT  | 1238739 | 799200  | 775597  | 2813536 | AC     | 1107286 | 1514092 | 819751  | 3441129 | 11.20644  | -61.80733 | -5.535344 | -20.068   |
| TA  | 567218  | 629116  | 810185  | 2006519 | TA     | 567218  | 629116  | 810185  | 2006519 | 0         | 0         | 0         | 0         |
| TC  | 1047689 | 1470169 | 1041029 | 3558887 | GA     | 2509894 | 755708  | 1528223 | 4793825 | -82.20216 | 64.19591  | -37.92497 | -29.56975 |
| TG  | 714891  | 2067071 | 2079443 | 4861405 | CA     | 1532987 | 1305504 | 2123618 | 4962109 | -72.78829 | 45.16235  | -2.102039 | -2.050264 |
| TT  | 1180438 | 1207693 | 785147  | 3173278 | AA     | 1964658 | 1482979 | 1109002 | 4556639 | -49.86938 | -20.46225 | -34.1953  | -35.79239 |

**Homo sapiens, CCDS v.24, Watson (+) strand counts, CDS on Crick (-) strand reverse complemented (strand-dependent case)**

| SEQ | P1      | P2      | P3      | TOTAL   | RC SEQ | P1      | P2      | P3      | TOTAL   | diff P1   | diff P2   | diff P3   | diff      |
|-----|---------|---------|---------|---------|--------|---------|---------|---------|---------|-----------|-----------|-----------|-----------|
| AA  | 1380912 | 1324077 | 1158535 | 3863524 | TT     | 1151052 | 1577804 | 1137537 | 3866393 | 18.15666  | -17.48707 | 1.829037  | -0.074231 |
| AC  | 942887  | 1384431 | 807614  | 3134932 | GT     | 1032978 | 949229  | 1137526 | 3119733 | -9.119145 | 37.29781  | -33.92167 | 0.486005  |
| AG  | 1266551 | 1928242 | 1497372 | 4692165 | CT     | 1618696 | 1275102 | 1799177 | 4692975 | -24.41004 | 40.77864  | -18.31036 | -0.017261 |
| AT  | 978697  | 1340680 | 959238  | 3278615 | AT     | 978697  | 1340680 | 959238  | 3278615 | 0         | 0         | 0         | 0         |
| CA  | 1807413 | 1011526 | 2097829 | 4916768 | TG     | 1405892 | 1807770 | 1693084 | 4906746 | 24.99115  | -56.48531 | 21.35343  | 0.204041  |
| CC  | 1657525 | 1533834 | 1392483 | 4583842 | GG     | 1517335 | 1170227 | 1868044 | 4555606 | 8.831256  | 26.8934   | -29.17081 | 0.617893  |
| CG  | 719330  | 583425  | 643412  | 1946167 | CG     | 719330  | 583425  | 643412  | 1946167 | 0         | 0         | 0         | 0         |
| CT  | 1618696 | 1275102 | 1799177 | 4692975 | AG     | 1266551 | 1928242 | 1497372 | 4692165 | 24.41004  | -40.77864 | 18.31036  | 0.017261  |
| GA  | 1785675 | 893113  | 1499668 | 4178456 | TC     | 1285396 | 1988095 | 900765  | 4174256 | 32.5801   | -76.00854 | 49.89958  | 0.100566  |



|    |         |         |         |         |    |         |         |         |         |           |           |           |           |
|----|---------|---------|---------|---------|----|---------|---------|---------|---------|-----------|-----------|-----------|-----------|
| GC | 1475962 | 1366452 | 1400457 | 4242871 | GC | 1475962 | 1366452 | 1400457 | 4242871 | 0         | 0         | 0         | 0         |
| GG | 1517335 | 1170227 | 1868044 | 4555606 | CC | 1657525 | 1533834 | 1392483 | 4583842 | -8.831256 | -26.8934  | 29.17081  | -0.617893 |
| GT | 1032978 | 949229  | 1137526 | 3119733 | AC | 942887  | 1384431 | 807614  | 3134932 | 9.119145  | -37.29781 | 33.92167  | -0.486005 |
| TA | 687999  | 597707  | 720813  | 2006519 | TA | 687999  | 597707  | 720813  | 2006519 | 0         | 0         | 0         | 0         |
| TC | 1285396 | 1988095 | 900765  | 4174256 | GA | 1785675 | 893113  | 1499668 | 4178456 | -32.5801  | 76.00854  | -49.89958 | -0.100566 |
| TG | 1405892 | 1807770 | 1693084 | 4906746 | CA | 1807413 | 1011526 | 2097829 | 4916768 | -24.99115 | 56.48531  | -21.35343 | -0.204041 |
| TT | 1151052 | 1577804 | 1137537 | 3866393 | AA | 1380912 | 1324077 | 1158535 | 3863524 | -18.15666 | 17.48707  | -1.829037 | 0.074231  |

**Mus musculus, CCDS v.23, CDS counts, strand orientation not taken in account (strand-independent case)**

| SEQ | P1      | P2      | P3      | TOTAL   | RC SEQ | P1      | P2      | P3      | TOTAL   | diff P1   | diff P2   | diff P3   | diff      |
|-----|---------|---------|---------|---------|--------|---------|---------|---------|---------|-----------|-----------|-----------|-----------|
| AA  | 1392020 | 973972  | 717358  | 3083350 | TT     | 865840  | 843913  | 536901  | 2246654 | 46.60874  | 14.30883  | 28.77508  | 31.3957   |
| AC  | 808600  | 1154774 | 604702  | 2568076 | GT     | 913367  | 601226  | 607149  | 2121742 | -12.16829 | 63.04647  | -0.403845 | 19.03417  |
| AG  | 872989  | 1658365 | 1188585 | 3719939 | CT     | 1194140 | 1040207 | 1051976 | 3286323 | -31.07218 | 45.81371  | 12.19418  | 12.37796  |
| AT  | 994330  | 907009  | 387932  | 2289271 | AT     | 994330  | 907009  | 387932  | 2289271 | 0         | 0         | 0         | 0         |
| CA  | 1108503 | 943112  | 1605070 | 3656685 | TG     | 530029  | 1530568 | 1521392 | 3581989 | 70.60881  | -47.49652 | 5.352888  | 2.063803  |
| CC  | 921507  | 1202238 | 1239904 | 3363649 | GG     | 953756  | 743995  | 1431523 | 3129274 | -3.439411 | 47.09025  | -14.34582 | 7.219399  |
| CG  | 466368  | 342443  | 529022  | 1337833 | CG     | 466368  | 342443  | 529022  | 1337833 | 0         | 0         | 0         | 0         |
| CT  | 1194140 | 1040207 | 1051976 | 3286323 | AG     | 872989  | 1658365 | 1188585 | 3719939 | 31.07218  | -45.81371 | -12.19418 | -12.37796 |
| GA  | 1773789 | 553688  | 1163332 | 3490809 | TC     | 768281  | 1144727 | 778696  | 2691704 | 79.10939  | -69.59889 | 39.61179  | 25.85049  |
| GC  | 1029612 | 924233  | 1067193 | 3021038 | GC     | 1029612 | 924233  | 1067193 | 3021038 | 0         | 0         | 0         | 0         |
| GG  | 953756  | 743995  | 1431523 | 3129274 | CC     | 921507  | 1202238 | 1239904 | 3363649 | 3.439411  | -47.09025 | 14.34582  | -7.219399 |
| GT  | 913367  | 601226  | 607149  | 2121742 | AC     | 808600  | 1154774 | 604702  | 2568076 | 12.16829  | -63.04647 | 0.403845  | -19.03417 |
| TA  | 419808  | 448469  | 555366  | 1423643 | TA     | 419808  | 448469  | 555366  | 1423643 | 0         | 0         | 0         | 0         |
| TC  | 768281  | 1144727 | 778696  | 2691704 | GA     | 1773789 | 553688  | 1163332 | 3490809 | -79.10939 | 69.59889  | -39.61179 | -25.85049 |
| TG  | 530029  | 1530568 | 1521392 | 3581989 | CA     | 1108503 | 943112  | 1605070 | 3656685 | -70.60881 | 47.49652  | -5.352888 | -2.063803 |
| TT  | 865840  | 843913  | 536901  | 2246654 | AA     | 1392020 | 973972  | 717358  | 3083350 | -46.60874 | -14.30883 | -28.77508 | -31.3957  |

**Mus musculus, CCDS v.23, Watson (+) strand counts, CDS on Crick (-) strand reverse complemented (strand-dependent case)**

| SEQ | P1     | P2      | P3      | TOTAL   | RC SEQ | P1      | P2      | P3      | TOTAL   | diff P1   | diff P2   | diff P3   | diff     |
|-----|--------|---------|---------|---------|--------|---------|---------|---------|---------|-----------|-----------|-----------|----------|
| AA  | 966856 | 924427  | 783025  | 2674308 | TT     | 789479  | 1114676 | 751541  | 2655696 | 20.19854  | -18.66007 | 4.10331   | 0.698386 |
| AC  | 705613 | 1036156 | 603986  | 2345755 | GT     | 757576  | 707548  | 878939  | 2344063 | -7.102705 | 37.6908   | -37.08252 | 0.072156 |
| AG  | 968180 | 1426573 | 1116741 | 3511494 | CT     | 1185373 | 956867  | 1352528 | 3494768 | -20.17067 | 39.41412  | -19.09772 | 0.477459 |

|    |         |         |         |         |    |         |         |         |         |           |           |           |           |
|----|---------|---------|---------|---------|----|---------|---------|---------|---------|-----------|-----------|-----------|-----------|
| AT | 689276  | 955551  | 644444  | 2289271 | AT | 689276  | 955551  | 644444  | 2289271 | 0         | 0         | 0         | 0         |
| CA | 1316431 | 739942  | 1564123 | 3620496 | TG | 1068856 | 1317931 | 1231391 | 3618178 | 20.75851  | -56.17344 | 23.80471  | 0.064045  |
| CC | 1179109 | 1074995 | 989727  | 3243831 | GG | 1097641 | 831353  | 1320098 | 3249092 | 7.156517  | 25.56113  | -28.60572 | -0.162053 |
| CG | 498366  | 404474  | 434993  | 1337833 | CG | 498366  | 404474  | 434993  | 1337833 | 0         | 0         | 0         | 0         |
| CT | 1185373 | 956867  | 1352528 | 3494768 | AG | 968180  | 1426573 | 1116741 | 3511494 | 20.17067  | -39.41412 | 19.09772  | -0.477459 |
| GA | 1278296 | 661668  | 1159316 | 3099280 | TC | 965558  | 1449648 | 668027  | 3083233 | 27.87508  | -74.64349 | 53.77086  | 0.519109  |
| GC | 1048235 | 974295  | 998508  | 3021038 | GC | 1048235 | 974295  | 998508  | 3021038 | 0         | 0         | 0         | 0         |
| GG | 1097641 | 831353  | 1320098 | 3249092 | CC | 1179109 | 1074995 | 989727  | 3243831 | -7.156517 | -25.56113 | 28.60572  | 0.162053  |
| GT | 757576  | 707548  | 878939  | 2344063 | AC | 705613  | 1036156 | 603986  | 2345755 | 7.102705  | -37.6908  | 37.08252  | -0.072156 |
| TA | 484770  | 436835  | 502038  | 1423643 | TA | 484770  | 436835  | 502038  | 1423643 | 0         | 0         | 0         | 0         |
| TC | 965558  | 1449648 | 668027  | 3083233 | GA | 1278296 | 661668  | 1159316 | 3099280 | -27.87508 | 74.64349  | -53.77086 | -0.519109 |
| TG | 1068856 | 1317931 | 1231391 | 3618178 | CA | 1316431 | 739942  | 1564123 | 3620496 | -20.75851 | 56.17344  | -23.80471 | -0.064045 |
| TT | 789479  | 1114676 | 751541  | 2655696 | AA | 966856  | 924427  | 783025  | 2674308 | -20.19854 | 18.66007  | -4.10331  | -0.698386 |

**Trinucleotide statistics and comparison with reverse-complementary counterpart at the three codon positions for CDS data of  
the Consensus coding sequence (CCDS) database**

**Homo sapiens, CCDS v.24, CDS counts, strand orientation not taken in account (strand-independent case)**

| SEQ | P1     | P2     | P3     | TOTAL   | RC SEQ | P1     | P2     | P3     | TOTAL   | diff P1   | diff P2   | diff P3   | diff      |
|-----|--------|--------|--------|---------|--------|--------|--------|--------|---------|-----------|-----------|-----------|-----------|
| AAA | 539355 | 424075 | 423518 | 1386948 | TTT    | 354871 | 214282 | 292020 | 861173  | 41.26116  | 65.72905  | 36.755    | 46.77462  |
| AAC | 389409 | 275755 | 205418 | 870582  | GTT    | 235841 | 127023 | 245053 | 607917  | 49.12211  | 73.85309  | -17.59714 | 35.53131  |
| AAG | 669186 | 565470 | 232326 | 1466982 | CTT    | 279736 | 232274 | 438024 | 950034  | 82.08262  | 83.53457  | -61.37033 | 42.77572  |
| AAT | 366708 | 207656 | 247740 | 822104  | ATT    | 337245 | 211568 | 205336 | 754149  | 8.370729  | -1.866305 | 18.71827  | 8.622347  |
| ACA | 324102 | 539981 | 274131 | 1138214 | TGT    | 212724 | 282328 | 425323 | 920375  | 41.49501  | 62.66574  | -43.23143 | 21.16391  |
| ACC | 376567 | 436288 | 227855 | 1040710 | GGT    | 222142 | 122070 | 355702 | 699914  | 51.586    | 112.5507  | -43.81646 | 39.15791  |
| ACG | 122179 | 213224 | 85177  | 420580  | CGT    | 94504  | 66589  | 181612 | 342705  | 25.54423  | 104.8093  | -72.29309 | 20.40522  |
| ACT | 284438 | 324599 | 232588 | 841625  | AGT    | 269830 | 304610 | 276096 | 850536  | 5.271096  | 6.353692  | -17.1061  | -1.053209 |
| AGA | 257732 | 653669 | 681463 | 1592864 | TCT    | 326602 | 348994 | 299354 | 974950  | -23.57214 | 60.77316  | 77.91647  | 48.12763  |
| AGC | 409311 | 575263 | 350189 | 1334763 | GCT    | 385770 | 299491 | 505292 | 1190553 | 5.921661  | 63.05133  | -36.261   | 11.42114  |
| AGG | 242537 | 703001 | 318953 | 1264491 | CCT    | 378789 | 386293 | 562401 | 1327483 | -43.85846 | 58.14922  | -55.24409 | -4.860543 |
| AGT | 269830 | 304610 | 276096 | 850536  | ACT    | 284438 | 324599 | 232588 | 841625  | -5.271096 | -6.353692 | 17.1061   | 1.053209  |
| ATA | 159174 | 259298 | 96842  | 515314  | TAT    | 251787 | 102144 | 212522 | 566453  | -45.07143 | 86.95946  | -74.78569 | -9.454716 |
| ATC | 412049 | 247212 | 178772 | 838033  | GAT    | 482989 | 94326  | 321045 | 898360  | -15.85184 | 89.52796  | -56.93004 | -6.948542 |
| ATG | 446725 | 615234 | 109160 | 1171119 | CAT    | 231828 | 185984 | 538370 | 956182  | 63.33978  | 107.1494  | -132.5684 | 20.20748  |
| ATT | 337245 | 211568 | 205336 | 754149  | AAT    | 366708 | 207656 | 247740 | 822104  | -8.370729 | 1.866305  | -18.71827 | -8.622347 |
| CAA | 270722 | 278127 | 646578 | 1195427 | TTG    | 269581 | 468404 | 108247 | 846232  | 0.422356  | -50.97632 | 142.6373  | 34.20699  |
| CAC | 305454 | 267263 | 444513 | 1017230 | GTG    | 561286 | 377222 | 175000 | 1113508 | -59.03316 | -34.12306 | 87.00802  | -9.037057 |
| CAG | 724983 | 574130 | 494157 | 1793270 | CTG    | 789479 | 618583 | 322484 | 1730546 | -8.517348 | -7.454098 | 42.04369  | 3.560004  |
| CAT | 231828 | 185984 | 538370 | 956182  | ATG    | 446725 | 615234 | 109160 | 1171119 | -63.33978 | -107.1494 | 132.5684  | -20.20748 |
| CCA | 370730 | 626530 | 499193 | 1496453 | TGG    | 245487 | 782801 | 481928 | 1510216 | 40.64899  | -22.17662 | 3.519444  | -0.915498 |
| CCC | 404738 | 462705 | 398091 | 1265534 | GGG    | 325944 | 336742 | 356085 | 1018771 | 21.56725  | 31.51253  | 11.13957  | 21.60508  |
| CCG | 140989 | 230161 | 258186 | 629336  | CGG    | 235368 | 210976 | 180820 | 627164  | -50.15398 | 8.697978  | 35.24599  | 0.345722  |
| CCT | 378789 | 386293 | 562401 | 1327483 | AGG    | 242537 | 703001 | 318953 | 1264491 | 43.85846  | -58.14922 | 55.24409  | 4.860543  |
| CGA | 131932 | 68587  | 249598 | 450117  | TCG    | 90722  | 155439 | 121527 | 367688  | 37.01708  | -77.53743 | 69.01772  | 20.1586   |
| CGC | 203407 | 152666 | 170108 | 526181  | GCG    | 144928 | 183314 | 200321 | 528563  | 33.5763   | -18.24394 | -16.31244 | -0.451674 |
| CGG | 235368 | 210976 | 180820 | 627164  | CCG    | 140989 | 230161 | 258186 | 629336  | 50.15398  | -8.697978 | -35.24599 | -0.345722 |
| CGT | 94504  | 66589  | 181612 | 342705  | ACG    | 122179 | 213224 | 85177  | 420580  | -25.54423 | -104.8093 | 72.29309  | -20.40522 |
| CTA | 149040 | 194638 | 222740 | 566418  | TAG    | 7832   | 205140 | 135143 | 348115  | 180.0296  | -5.253916 | 48.95287  | 47.74087  |

|     |        |        |        |         |     |        |        |        |         |           |           |           |           |
|-----|--------|--------|--------|---------|-----|--------|--------|--------|---------|-----------|-----------|-----------|-----------|
| CTC | 381424 | 330104 | 376129 | 1087657 | GAG | 842373 | 281961 | 317784 | 1442118 | -75.33096 | 15.73134  | 16.81623  | -28.02312 |
| CTG | 789479 | 618583 | 322484 | 1730546 | CAG | 724983 | 574130 | 494157 | 1793270 | 8.517348  | 7.454098  | -42.04369 | -3.560004 |
| CTT | 279736 | 232274 | 438024 | 950034  | AAG | 669186 | 565470 | 232326 | 1466982 | -82.08262 | -83.53457 | 61.37033  | -42.77572 |
| GAA | 662879 | 222350 | 605650 | 1490879 | TTC | 388601 | 302634 | 264828 | 956063  | 52.16989  | -30.58531 | 78.30686  | 43.71301  |
| GAC | 521653 | 139351 | 283744 | 944748  | GTC | 288095 | 161079 | 227960 | 677134  | 57.68659  | -14.4646  | 21.80323  | 33.00043  |
| GAG | 842373 | 281961 | 317784 | 1442118 | CTC | 381424 | 330104 | 376129 | 1087657 | 75.33096  | -15.73134 | -16.81623 | 28.02312  |
| GAT | 482989 | 94326  | 321045 | 898360  | ATC | 412049 | 247212 | 178772 | 838033  | 15.85184  | -89.52796 | 56.93004  | 6.948542  |
| GCA | 341475 | 421122 | 438577 | 1201174 | TGC | 238899 | 508370 | 427708 | 1174977 | 35.34824  | -18.77327 | 2.509336  | 2.204995  |
| GCC | 563216 | 389127 | 370238 | 1322581 | GGC | 441437 | 278129 | 487384 | 1206950 | 24.243    | 33.26999  | -27.3188  | 9.142485  |
| GCG | 144928 | 183314 | 200321 | 528563  | CGC | 203407 | 152666 | 170108 | 526181  | -33.5763  | 18.24394  | 16.31244  | 0.451674  |
| GCT | 385770 | 299491 | 505292 | 1190553 | AGC | 409311 | 575263 | 350189 | 1334763 | -5.921661 | -63.05133 | 36.261    | -11.42114 |
| GGA | 348263 | 312395 | 834349 | 1495007 | TCC | 361168 | 429751 | 299062 | 1089981 | -3.638127 | -31.62612 | 94.45594  | 31.33678  |
| GGC | 441437 | 278129 | 487384 | 1206950 | GCC | 563216 | 389127 | 370238 | 1322581 | -24.243   | -33.26999 | 27.3188   | -9.142485 |
| GGG | 325944 | 336742 | 356085 | 1018771 | CCC | 404738 | 462705 | 398091 | 1265534 | -21.56725 | -31.51253 | -11.13957 | -21.60508 |
| GGT | 222142 | 122070 | 355702 | 699914  | ACC | 376567 | 436288 | 227855 | 1040710 | -51.586   | -112.5507 | 43.81646  | -39.15791 |
| GTA | 153517 | 133876 | 127584 | 414977  | TAC | 297576 | 137382 | 173608 | 608566  | -63.87109 | -2.584993 | -30.56124 | -37.82723 |
| GTC | 288095 | 161079 | 227960 | 677134  | GAC | 521653 | 139351 | 283744 | 944748  | -57.68659 | 14.4646   | -21.80323 | -33.00043 |
| GTG | 561286 | 377222 | 175000 | 1113508 | CAC | 305454 | 267263 | 444513 | 1017230 | 59.03316  | 34.12306  | -87.00802 | 9.037057  |
| GTT | 235841 | 127023 | 245053 | 607917  | AAC | 389409 | 275755 | 205418 | 870582  | -49.12211 | -73.85309 | 17.59714  | -35.53131 |
| TAA | 10023  | 184450 | 288912 | 483385  | TTA | 167385 | 222373 | 120052 | 509810  | -177.4012 | -18.64349 | 82.5794   | -5.321211 |
| TAC | 297576 | 137382 | 173608 | 608566  | GTA | 153517 | 133876 | 127584 | 414977  | 63.87109  | 2.584993  | 30.56124  | 37.82723  |
| TAG | 7832   | 205140 | 135143 | 348115  | CTA | 149040 | 194638 | 222740 | 566418  | -180.0296 | 5.253916  | -48.95287 | -47.74087 |
| TAT | 251787 | 102144 | 212522 | 566453  | ATA | 159174 | 259298 | 96842  | 515314  | 45.07143  | -86.95946 | 74.78569  | 9.454716  |
| TCA | 269197 | 535985 | 321086 | 1126268 | TGA | 17781  | 493572 | 744484 | 1255837 | 175.2162  | 8.239078  | -79.46883 | -10.87853 |
| TCC | 361168 | 429751 | 299062 | 1089981 | GGA | 348263 | 312395 | 834349 | 1495007 | 3.638127  | 31.62612  | -94.45594 | -31.33678 |
| TCG | 90722  | 155439 | 121527 | 367688  | CGA | 131932 | 68587  | 249598 | 450117  | -37.01708 | 77.53743  | -69.01772 | -20.1586  |
| TCT | 326602 | 348994 | 299354 | 974950  | AGA | 257732 | 653669 | 681463 | 1592864 | 23.57214  | -60.77316 | -77.91647 | -48.12763 |
| TGA | 17781  | 493572 | 744484 | 1255837 | TCA | 269197 | 535985 | 321086 | 1126268 | -175.2162 | -8.239078 | 79.46883  | 10.87853  |
| TGC | 238899 | 508370 | 427708 | 1174977 | GCA | 341475 | 421122 | 438577 | 1201174 | -35.34824 | 18.77327  | -2.509336 | -2.204995 |
| TGG | 245487 | 782801 | 481928 | 1510216 | CCA | 370730 | 626530 | 499193 | 1496453 | -40.64899 | 22.17662  | -3.519444 | 0.915498  |
| TGT | 212724 | 282328 | 425323 | 920375  | ACA | 324102 | 539981 | 274131 | 1138214 | -41.49501 | -62.66574 | 43.23143  | -21.16391 |
| TTA | 167385 | 222373 | 120052 | 509810  | TAA | 10023  | 184450 | 288912 | 483385  | 177.4012  | 18.64349  | -82.5794  | 5.321211  |
| TTC | 388601 | 302634 | 264828 | 956063  | GAA | 662879 | 222350 | 605650 | 1490879 | -52.16989 | 30.58531  | -78.30686 | -43.71301 |
| TTG | 269581 | 468404 | 108247 | 846232  | CAA | 270722 | 278127 | 646578 | 1195427 | -0.422356 | 50.97632  | -142.6373 | -34.20699 |

TTT 354871 214282 292020 861173 AAA 539355 424075 423518 1386948 -41.26116 -65.72905 -36.755 -46.77462

**Homo sapiens, CCDS v.24, Watson (+) strand counts, CDS on Crick (-) strand reverse complemented (strand-dependent case)**

| SEQ | P1     | P2     | P3     | TOTAL   | RC SEI | P1     | P2     | P3     | TOTAL   | diff P1   | diff P2   | diff P3   | diff      |
|-----|--------|--------|--------|---------|--------|--------|--------|--------|---------|-----------|-----------|-----------|-----------|
| AAA | 376132 | 357321 | 388676 | 1122129 | TTT    | 390372 | 318591 | 417029 | 1125992 | -3.715571 | 11.46007  | -7.03806  | -0.343665 |
| AAC | 262068 | 257841 | 221202 | 741111  | GTT    | 256201 | 166294 | 314893 | 737388  | 2.264075  | 43.1688   | -34.95313 | 0.503619  |
| AAG | 453541 | 496813 | 256540 | 1206894 | CTT    | 423455 | 232758 | 553909 | 1210122 | 6.861149  | 72.38638  | -73.38377 | -0.267106 |
| AAT | 289171 | 206969 | 292117 | 788257  | ATT    | 271530 | 231606 | 284860 | 787996  | 6.29248   | -11.23502 | 2.515525  | 0.033117  |
| ACA | 302084 | 487839 | 242983 | 1032906 | TGT    | 372470 | 280496 | 372717 | 1025683 | -20.8689  | 53.97203  | -42.14195 | 0.701743  |
| ACC | 252106 | 397206 | 225334 | 874646  | GGT    | 325692 | 174890 | 365396 | 865978  | -25.47119 | 77.71982  | -47.41997 | 0.995965  |
| ACG | 95239  | 197572 | 90319  | 383130  | CGT    | 150737 | 76404  | 153014 | 380155  | -45.12473 | 88.45154  | -51.53021 | 0.779525  |
| ACT | 293458 | 301809 | 248978 | 844245  | AGT    | 297860 | 270314 | 279742 | 847916  | -1.488877 | 11.00987  | -11.63716 | -0.433883 |
| AGA | 299262 | 480996 | 502865 | 1283123 | TCT    | 487160 | 517089 | 280442 | 1284691 | -47.78554 | -7.23245  | 56.79076  | -0.122127 |
| AGC | 357942 | 540336 | 367167 | 1265445 | GCT    | 480076 | 325921 | 453874 | 1259871 | -29.1483  | 49.50378  | -21.12124 | 0.44145   |
| AGG | 311487 | 632577 | 347598 | 1291662 | CCT    | 537525 | 357243 | 405544 | 1300312 | -53.2473  | 55.63315  | -15.3878  | -0.667445 |
| AGT | 297860 | 270314 | 279742 | 847916  | ACT    | 293458 | 301809 | 248978 | 844245  | 1.488877  | -11.00987 | 11.63716  | 0.433883  |
| ATA | 130780 | 236812 | 174330 | 541922  | TAT    | 254111 | 100060 | 185674 | 539845  | -64.0862  | 81.18929  | -6.302152 | 0.384001  |
| ATC | 257350 | 281320 | 328998 | 867668  | GAT    | 367877 | 135331 | 365517 | 868725  | -35.3558  | 70.07735  | -10.5164  | -0.121747 |
| ATG | 319037 | 573548 | 171050 | 1063635 | CAT    | 422153 | 147750 | 493763 | 1063666 | -27.82444 | 118.0644  | -97.08384 | -0.002914 |
| ATT | 271530 | 231606 | 284860 | 787996  | AAT    | 289171 | 206969 | 292117 | 788257  | -6.29248  | 11.23502  | -2.515525 | -0.033117 |
| CAA | 369266 | 193419 | 460222 | 1022907 | TTG    | 275264 | 553984 | 189504 | 1018752 | 29.16916  | -96.48476 | 83.33297  | 0.407022  |
| CAC | 342593 | 222057 | 502658 | 1067308 | GTG    | 416581 | 408458 | 238391 | 1063430 | -19.49171 | -59.12659 | 71.32241  | 0.364005  |
| CAG | 673401 | 448300 | 641186 | 1762887 | CTG    | 684955 | 554117 | 521857 | 1760929 | -1.701174 | -21.11237 | 20.52014  | 0.11113   |
| CAT | 422153 | 147750 | 493763 | 1063666 | ATG    | 319037 | 573548 | 171050 | 1063635 | 27.82444  | -118.0644 | 97.08384  | 0.002914  |
| CCA | 571608 | 560035 | 375702 | 1507345 | TGG    | 429896 | 643914 | 425514 | 1499324 | 28.29984  | -13.93398 | -12.4341  | 0.533547  |
| CCC | 373331 | 411109 | 364208 | 1148648 | GGG    | 391831 | 365256 | 378570 | 1135657 | -4.835577 | 11.81223  | -3.867104 | 1.137414  |
| CCG | 175061 | 205447 | 247029 | 627537  | CGG    | 233816 | 233991 | 161156 | 628963  | -28.73969 | -12.99114 | 42.07553  | -0.22698  |
| CCT | 537525 | 357243 | 405544 | 1300312 | AGG    | 311487 | 632577 | 347598 | 1291662 | 53.2473   | -55.63315 | 15.3878   | 0.667445  |
| CGA | 142293 | 95544  | 171458 | 409295  | TCG    | 79756  | 202399 | 126355 | 408510  | 56.32721  | -71.72848 | 30.28948  | 0.191977  |
| CGC | 192484 | 177486 | 157784 | 527754  | GCG    | 148762 | 176720 | 201508 | 526990  | 25.62492  | 0.432517  | -24.33898 | 0.144869  |
| CGG | 233816 | 233991 | 161156 | 628963  | CCG    | 175061 | 205447 | 247029 | 627537  | 28.73969  | 12.99114  | -42.07553 | 0.22698   |
| CGT | 150737 | 76404  | 153014 | 380155  | ACG    | 95239  | 197572 | 90319  | 383130  | 45.12473  | -88.45154 | 51.53021  | -0.779525 |
| CTA | 177436 | 164953 | 116595 | 458984  | TAG    | 100501 | 212939 | 142109 | 455549  | 55.36147  | -25.39667 | -19.72447 | 0.751203  |

|     |        |        |        |         |     |        |        |        |         |           |           |           |           |
|-----|--------|--------|--------|---------|-----|--------|--------|--------|---------|-----------|-----------|-----------|-----------|
| CTC | 332850 | 323274 | 606816 | 1262940 | GAG | 590487 | 325964 | 350384 | 1266835 | -55.80563 | -0.828664 | 53.57961  | -0.307933 |
| CTG | 684955 | 554117 | 521857 | 1760929 | CAG | 673401 | 448300 | 641186 | 1762887 | 1.701174  | 21.11237  | -20.52014 | -0.11113  |
| CTT | 423455 | 232758 | 553909 | 1210122 | AAG | 453541 | 496813 | 256540 | 1206894 | -6.861149 | -72.38638 | 73.38377  | 0.267106  |
| GAA | 482198 | 242331 | 497256 | 1221785 | TTC | 309480 | 450038 | 465639 | 1225157 | 43.6334   | -59.99893 | 6.567071  | -0.275609 |
| GAC | 345113 | 180467 | 286511 | 812091  | GTC | 215232 | 221245 | 373314 | 809791  | 46.35751  | -20.30211 | -26.31092 | 0.283621  |
| GAG | 590487 | 325964 | 350384 | 1266835 | CTC | 332850 | 323274 | 606816 | 1262940 | 55.80563  | 0.828664  | -53.57961 | 0.307933  |
| GAT | 367877 | 135331 | 365517 | 868725  | ATC | 257350 | 281320 | 328998 | 867668  | 35.3558   | -70.07735 | 10.5164   | 0.121747  |
| GCA | 422782 | 425897 | 338504 | 1187183 | TGC | 328528 | 474566 | 385874 | 1188968 | 25.09058  | -10.80977 | -13.07881 | -0.150243 |
| GCC | 424342 | 437914 | 406571 | 1268827 | GGC | 414100 | 322040 | 524564 | 1260704 | 2.443103  | 30.495    | -25.34391 | 0.642253  |
| GCG | 148762 | 176720 | 201508 | 526990  | CGC | 192484 | 177486 | 157784 | 527754  | -25.62492 | -0.432517 | 24.33898  | -0.144869 |
| GCT | 480076 | 325921 | 453874 | 1259871 | AGC | 357942 | 540336 | 367167 | 1265445 | 29.1483   | -49.50378 | 21.12124  | -0.44145  |
| GGA | 385712 | 308041 | 599514 | 1293267 | TCC | 338216 | 629424 | 324081 | 1291721 | 13.12175  | -68.56427 | 59.64367  | 0.119614  |
| GGC | 414100 | 322040 | 524564 | 1260704 | GCC | 424342 | 437914 | 406571 | 1268827 | -2.443103 | -30.495   | 25.34391  | -0.642253 |
| GGG | 391831 | 365256 | 378570 | 1135657 | CCC | 373331 | 411109 | 364208 | 1148648 | 4.835577  | -11.81223 | 3.867104  | -1.137414 |
| GGT | 325692 | 174890 | 365396 | 865978  | ACC | 252106 | 397206 | 225334 | 874646  | 25.47119  | -77.71982 | 47.41997  | -0.995965 |
| GTA | 144964 | 153229 | 210928 | 509121  | TAC | 216759 | 132879 | 164784 | 514422  | -39.69612 | 14.2254   | 24.5635   | -1.035814 |
| GTC | 215232 | 221245 | 373314 | 809791  | GAC | 345113 | 180467 | 286511 | 812091  | -46.35751 | 20.30211  | 26.31092  | -0.283621 |
| GTG | 416581 | 408458 | 238391 | 1063430 | CAC | 342593 | 222057 | 502658 | 1067308 | 19.49171  | 59.12659  | -71.32241 | -0.364005 |
| GTT | 256201 | 166294 | 314893 | 737388  | AAC | 262068 | 257841 | 221202 | 741111  | -2.264075 | -43.1688  | 34.95313  | -0.503619 |
| TAA | 116628 | 151829 | 228246 | 496703  | TTA | 175936 | 255191 | 65365  | 496492  | -40.54361 | -50.78964 | 110.9502  | 0.042489  |
| TAC | 216759 | 132879 | 164784 | 514422  | GTA | 144964 | 153229 | 210928 | 509121  | 39.69612  | -14.2254  | -24.5635  | 1.035814  |
| TAG | 100501 | 212939 | 142109 | 455549  | CTA | 177436 | 164953 | 116595 | 458984  | -55.36147 | 25.39667  | 19.72447  | -0.751203 |
| TAT | 254111 | 100060 | 185674 | 539845  | ATA | 130780 | 236812 | 174330 | 541922  | 64.0862   | -81.18929 | 6.302152  | -0.384001 |
| TCA | 380264 | 639183 | 169887 | 1189334 | TGA | 274998 | 408794 | 508979 | 1192771 | 32.12944  | 43.96833  | -99.89954 | -0.288568 |
| TCC | 338216 | 629424 | 324081 | 1291721 | GGA | 385712 | 308041 | 599514 | 1293267 | -13.12175 | 68.56427  | -59.64367 | -0.119614 |
| TCG | 79756  | 202399 | 126355 | 408510  | CGA | 142293 | 95544  | 171458 | 409295  | -56.32721 | 71.72848  | -30.28948 | -0.191977 |
| TCT | 487160 | 517089 | 280442 | 1284691 | AGA | 299262 | 480996 | 502865 | 1283123 | 47.78554  | 7.23245   | -56.79076 | 0.122127  |
| TGA | 274998 | 408794 | 508979 | 1192771 | TCA | 380264 | 639183 | 169887 | 1189334 | -32.12944 | -43.96833 | 99.89954  | 0.288568  |
| TGC | 328528 | 474566 | 385874 | 1188968 | GCA | 422782 | 425897 | 338504 | 1187183 | -25.09058 | 10.80977  | 13.07881  | 0.150243  |
| TGG | 429896 | 643914 | 425514 | 1499324 | CCA | 571608 | 560035 | 375702 | 1507345 | -28.29984 | 13.93398  | 12.4341   | -0.533547 |
| TGT | 372470 | 280496 | 372717 | 1025683 | ACA | 302084 | 487839 | 242983 | 1032906 | 20.8689   | -53.97203 | 42.14195  | -0.701743 |
| TTA | 175936 | 255191 | 65365  | 496492  | TAA | 116628 | 151829 | 228246 | 496703  | 40.54361  | 50.78964  | -110.9502 | -0.042489 |
| TTC | 309480 | 450038 | 465639 | 1225157 | GAA | 482198 | 242331 | 497256 | 1221785 | -43.6334  | 59.99893  | -6.567071 | 0.275609  |
| TTG | 275264 | 553984 | 189504 | 1018752 | CAA | 369266 | 193419 | 460222 | 1022907 | -29.16916 | 96.48476  | -83.33297 | -0.407022 |

TTT 390372 318591 417029 1125992 AAA 376132 357321 388676 1122129 3.715571 -11.46007 7.03806 0.343665

**Mus musculus, CCDS v.23, CDS counts, strand orientation not taken in account (strand-independent case)**

| SEQ | P1     | P2     | P3     | TOTAL   | RC SE P1 | P2     | P3     | TOTAL  | diff P1 | diff P2   | diff P3   | diff      |           |
|-----|--------|--------|--------|---------|----------|--------|--------|--------|---------|-----------|-----------|-----------|-----------|
| AAA | 344524 | 259057 | 264355 | 867936  | TTT      | 251749 | 144997 | 194324 | 591070  | 31.1183   | 56.4578   | 30.53595  | 37.95269  |
| AAC | 300835 | 187146 | 136101 | 624082  | GTT      | 161998 | 90122  | 193590 | 445710  | 59.99443  | 69.98572  | -34.87447 | 33.34704  |
| AAG | 507899 | 397294 | 161003 | 1066196 | CTT      | 201310 | 167565 | 349537 | 718412  | 86.45942  | 81.3403   | -73.8567  | 38.97595  |
| AAT | 238762 | 123133 | 155899 | 517794  | ATT      | 228856 | 134217 | 128389 | 491462  | 4.236792  | -8.61395  | 19.35361  | 5.218101  |
| ACA | 242693 | 417104 | 199596 | 859393  | TGT      | 165691 | 226026 | 330440 | 722157  | 37.71059  | 59.42127  | -49.37174 | 17.35462  |
| ACC | 274864 | 327332 | 165117 | 767313  | GGT      | 167385 | 92653  | 261079 | 521117  | 48.60565  | 111.7559  | -45.03186 | 38.21643  |
| ACG | 85561  | 155201 | 63276  | 304038  | CGT      | 69528  | 53615  | 120755 | 243898  | 20.67587  | 97.29714  | -62.46665 | 21.95147  |
| ACT | 205482 | 255137 | 176713 | 637332  | AGT      | 198622 | 234855 | 201091 | 634568  | 3.395166  | 8.278503  | -12.9051  | 0.434625  |
| AGA | 186949 | 496851 | 488735 | 1172535 | TCT      | 248960 | 281583 | 239636 | 770179  | -28.45135 | 55.30796  | 68.39893  | 41.42205  |
| AGC | 301964 | 421685 | 262384 | 986033  | GCT      | 301236 | 227745 | 365985 | 894966  | 0.241379  | 59.72622  | -32.97457 | 9.682833  |
| AGG | 185454 | 498800 | 236375 | 920629  | CCT      | 284529 | 287511 | 411783 | 983823  | -42.1611  | 53.74184  | -54.12507 | -6.63645  |
| AGT | 198622 | 234855 | 201091 | 634568  | ACT      | 205482 | 255137 | 176713 | 637332  | -3.395166 | -8.278503 | 12.9051   | -0.434625 |
| ATA | 110566 | 165602 | 63894  | 340062  | TAT      | 175959 | 69248  | 146671 | 391878  | -45.64558 | 82.05578  | -78.6237  | -14.15854 |
| ATC | 321744 | 170302 | 120153 | 612199  | GAT      | 328264 | 65446  | 247504 | 641214  | -2.006129 | 88.956    | -69.27707 | -4.629759 |
| ATG | 333164 | 436888 | 75496  | 845548  | CAT      | 164024 | 130105 | 417445 | 711574  | 68.03865  | 108.214   | -138.7383 | 17.2079   |
| ATT | 228856 | 134217 | 128389 | 491462  | AAT      | 238762 | 123133 | 155899 | 517794  | -4.236792 | 8.61395   | -19.35361 | -5.218101 |
| CAA | 186267 | 185957 | 484540 | 856764  | TTG      | 201337 | 335527 | 77494  | 614358  | -7.775978 | -57.36322 | 144.8475  | 32.95525  |
| CAC | 227619 | 205586 | 331881 | 765086  | GTG      | 414952 | 284707 | 133064 | 832723  | -58.30733 | -32.27499 | 85.5228   | -8.466218 |
| CAG | 530593 | 421464 | 371204 | 1323261 | CTG      | 581115 | 464270 | 243975 | 1289360 | -9.089077 | -9.665656 | 41.36325  | 2.595172  |
| CAT | 164024 | 130105 | 417445 | 711574  | ATG      | 333164 | 436888 | 75496  | 845548  | -68.03865 | -108.214  | 138.7383  | -17.2079  |
| CCA | 270157 | 460456 | 368717 | 1099330 | TGG      | 176351 | 567495 | 353073 | 1096919 | 42.01761  | -20.8257  | 4.334779  | 0.219556  |
| CCC | 272350 | 309867 | 279311 | 861528  | GGG      | 224671 | 226640 | 243335 | 694646  | 19.18591  | 31.0255   | 13.76687  | 21.44773  |
| CCG | 94471  | 144404 | 180093 | 418968  | CGG      | 157519 | 138588 | 120973 | 417080  | -50.04008 | 4.110364  | 39.27378  | 0.451649  |
| CCT | 284529 | 287511 | 411783 | 983823  | AGG      | 185454 | 498800 | 236375 | 920629  | 42.1611   | -53.74184 | 54.12507  | 6.63645   |
| CGA | 101660 | 55727  | 174575 | 331962  | TCG      | 65069  | 114346 | 91793  | 271208  | 43.89278  | -68.93393 | 62.15611  | 20.1449   |
| CGC | 137661 | 94513  | 112719 | 344893  | GCG      | 97342  | 115071 | 131206 | 343619  | 34.3136   | -19.61791 | -15.15794 | 0.370073  |
| CGG | 157519 | 138588 | 120973 | 417080  | CCG      | 94471  | 144404 | 180093 | 418968  | 50.04008  | -4.110364 | -39.27378 | -0.451649 |
| CGT | 69528  | 53615  | 120755 | 243898  | ACG      | 85561  | 155201 | 63276  | 304038  | -20.67587 | -97.29714 | 62.46665  | -21.95147 |

|     |        |        |        |         |     |        |        |        |         |           |           |           |           |
|-----|--------|--------|--------|---------|-----|--------|--------|--------|---------|-----------|-----------|-----------|-----------|
| CTA | 120389 | 146830 | 173175 | 440394  | TAG | 6175   | 155624 | 93674  | 255473  | 180.4842  | -5.815099 | 59.58501  | 53.14837  |
| CTC | 291326 | 261542 | 285289 | 838157  | GAG | 613698 | 214203 | 247108 | 1075009 | -71.24054 | 19.901    | 14.34306  | -24.76021 |
| CTG | 581115 | 464270 | 243975 | 1289360 | CAG | 530593 | 421464 | 371204 | 1323261 | 9.089077  | 9.665656  | -41.36325 | -2.595172 |
| CTT | 201310 | 167565 | 349537 | 718412  | AAG | 507899 | 397294 | 161003 | 1066196 | -86.45942 | -81.3403  | 73.8567   | -38.97595 |
| GAA | 435839 | 152723 | 451355 | 1039917 | TTC | 307106 | 218769 | 182660 | 708535  | 34.65479  | -35.55716 | 84.75982  | 37.90576  |
| GAC | 395988 | 107994 | 217365 | 721347  | GTC | 224551 | 128083 | 180179 | 532813  | 55.25422  | -17.01902 | 18.70787  | 30.06538  |
| GAG | 613698 | 214203 | 247108 | 1075009 | CTC | 291326 | 261542 | 285289 | 838157  | 71.24054  | -19.901   | -14.34306 | 24.76021  |
| GAT | 328264 | 65446  | 247504 | 641214  | ATC | 321744 | 170302 | 120153 | 612199  | 2.006129  | -88.956   | 69.27707  | 4.629759  |
| GCA | 244744 | 311214 | 313441 | 869399  | TGC | 174623 | 361753 | 318219 | 854595  | 33.44135  | -15.01976 | -1.512839 | 1.717407  |
| GCC | 386290 | 270203 | 256561 | 913054  | GGC | 309985 | 189242 | 336290 | 835517  | 21.91806  | 35.24296  | -26.89681 | 8.868613  |
| GCG | 97342  | 115071 | 131206 | 343619  | CGC | 137661 | 94513  | 112719 | 344893  | -34.3136  | 19.61791  | 15.15794  | -0.370073 |
| GCT | 301236 | 227745 | 365985 | 894966  | AGC | 301964 | 421685 | 262384 | 986033  | -0.241379 | -59.72622 | 32.97457  | -9.682833 |
| GGA | 251715 | 235460 | 590819 | 1077994 | TCC | 268734 | 332502 | 220518 | 821754  | -6.540122 | -34.172   | 91.28167  | 26.97621  |
| GGC | 309985 | 189242 | 336290 | 835517  | GCC | 386290 | 270203 | 256561 | 913054  | -21.91806 | -35.24296 | 26.89681  | -8.868613 |
| GGG | 224671 | 226640 | 243335 | 694646  | CCC | 272350 | 309867 | 279311 | 861528  | -19.18591 | -31.0255  | -13.76687 | -21.44773 |
| GGT | 167385 | 92653  | 261079 | 521117  | ACC | 274864 | 327332 | 165117 | 767313  | -48.60565 | -111.7559 | 45.03186  | -38.21643 |
| GTA | 111866 | 98314  | 100316 | 310496  | TAC | 230332 | 103976 | 123251 | 457559  | -69.23828 | -5.597904 | -20.51734 | -38.29491 |
| GTC | 224551 | 128083 | 180179 | 532813  | GAC | 395988 | 107994 | 217365 | 721347  | -55.25422 | 17.01902  | -18.70787 | -30.06538 |
| GTG | 414952 | 284707 | 133064 | 832723  | CAC | 227619 | 205586 | 331881 | 765086  | 58.30733  | 32.27499  | -85.5228  | 8.466218  |
| GTT | 161998 | 90122  | 193590 | 445710  | AAC | 300835 | 187146 | 136101 | 624082  | -59.99443 | -69.98572 | 34.87447  | -33.34704 |
| TAA | 7342   | 119621 | 191770 | 318733  | TTA | 105648 | 144620 | 82423  | 332691  | -174.0083 | -18.92136 | 79.75915  | -4.285381 |
| TAC | 230332 | 103976 | 123251 | 457559  | GTA | 111866 | 98314  | 100316 | 310496  | 69.23828  | 5.597904  | 20.51734  | 38.29491  |
| TAG | 6175   | 155624 | 93674  | 255473  | CTA | 120389 | 146830 | 173175 | 440394  | -180.4842 | 5.815099  | -59.58501 | -53.14837 |
| TAT | 175959 | 69248  | 146671 | 391878  | ATA | 110566 | 165602 | 63894  | 340062  | 45.64558  | -82.05578 | 78.6237   | 14.15854  |
| TCA | 185518 | 416296 | 226749 | 828563  | TGA | 13364  | 375294 | 519660 | 908318  | 173.1218  | 10.3594   | -78.48539 | -9.183703 |
| TCC | 268734 | 332502 | 220518 | 821754  | GGA | 251715 | 235460 | 590819 | 1077994 | 6.540122  | 34.172    | -91.28167 | -26.97621 |
| TCG | 65069  | 114346 | 91793  | 271208  | CGA | 101660 | 55727  | 174575 | 331962  | -43.89278 | 68.93393  | -62.15611 | -20.1449  |
| TCT | 248960 | 281583 | 239636 | 770179  | AGA | 186949 | 496851 | 488735 | 1172535 | 28.45135  | -55.30796 | -68.39893 | -41.42205 |
| TGA | 13364  | 375294 | 519660 | 908318  | TCA | 185518 | 416296 | 226749 | 828563  | -173.1218 | -10.3594  | 78.48539  | 9.183703  |
| TGC | 174623 | 361753 | 318219 | 854595  | GCA | 244744 | 311214 | 313441 | 869399  | -33.44135 | 15.01976  | 1.512839  | -1.717407 |
| TGG | 176351 | 567495 | 353073 | 1096919 | CCA | 270157 | 460456 | 368717 | 1099330 | -42.01761 | 20.8257   | -4.334779 | -0.219556 |
| TGT | 165691 | 226026 | 330440 | 722157  | ACA | 242693 | 417104 | 199596 | 859393  | -37.71059 | -59.42127 | 49.37174  | -17.35462 |
| TTA | 105648 | 144620 | 82423  | 332691  | TAA | 7342   | 119621 | 191770 | 318733  | 174.0083  | 18.92136  | -79.75915 | 4.285381  |
| TTC | 307106 | 218769 | 182660 | 708535  | GAA | 435839 | 152723 | 451355 | 1039917 | -34.65479 | 35.55716  | -84.75982 | -37.90576 |



|     |        |        |        |        |     |        |        |        |        |          |          |           |           |
|-----|--------|--------|--------|--------|-----|--------|--------|--------|--------|----------|----------|-----------|-----------|
| TTG | 201337 | 335527 | 77494  | 614358 | CAA | 186267 | 185957 | 484540 | 856764 | 7.775978 | 57.36322 | -144.8475 | -32.95525 |
| TTT | 251749 | 144997 | 194324 | 591070 | AAA | 344524 | 259057 | 264355 | 867936 | -31.1183 | -56.4578 | -30.53595 | -37.95269 |

**Mus musculus, CCDS v.23, Watson (+) strand counts, CDS on Crick (-) strand reverse complemented (strand-dependent case)**

| SEQ | P1     | P2     | P3     | TOTAL   | RC SEI | P1     | P2     | P3     | TOTAL   | diff P1   | diff P2   | diff P3   | diff      |
|-----|--------|--------|--------|---------|--------|--------|--------|--------|---------|-----------|-----------|-----------|-----------|
| AAA | 246485 | 227564 | 259556 | 733605  | TTT    | 253898 | 203274 | 268229 | 725401  | -2.96293  | 11.2757   | -3.286566 | 1.124601  |
| AAC | 195794 | 191136 | 148747 | 535677  | GTT    | 173596 | 113511 | 247008 | 534115  | 12.01873  | 50.96062  | -49.65749 | 0.292019  |
| AAG | 337626 | 376271 | 181886 | 895783  | CTT    | 297688 | 163540 | 427597 | 888825  | 12.57268  | 78.81685  | -80.62932 | 0.779779  |
| AAT | 186951 | 125714 | 192836 | 505501  | ATT    | 175370 | 145310 | 183075 | 503755  | 6.392674  | -14.46071 | 5.193251  | 0.345997  |
| ACA | 234206 | 375873 | 184002 | 794081  | TGT    | 288882 | 212122 | 286465 | 787469  | -20.90509 | 55.69809  | -43.558   | 0.836142  |
| ACC | 182068 | 293952 | 166321 | 642341  | GGT    | 247829 | 128831 | 269429 | 646089  | -30.59384 | 78.11147  | -47.32438 | -0.581793 |
| ACG | 69411  | 138253 | 66671  | 274335  | CGT    | 112266 | 57886  | 103449 | 273601  | -47.17713 | 81.94903  | -43.23771 | 0.267915  |
| ACT | 219928 | 228076 | 186992 | 634996  | AGT    | 227374 | 205691 | 203839 | 636904  | -3.329294 | 10.32121  | -8.621118 | -0.300024 |
| AGA | 236931 | 368535 | 370900 | 976366  | TCT    | 373572 | 380441 | 212335 | 966348  | -44.76342 | -3.179274 | 54.37431  | 1.031341  |
| AGC | 265467 | 393379 | 282809 | 941655  | GCT    | 362009 | 242737 | 334598 | 939344  | -30.77154 | 47.36306  | -16.77629 | 0.24572   |
| AGG | 238408 | 455844 | 259193 | 953445  | CCT    | 394038 | 260715 | 296254 | 951007  | -49.21527 | 54.46279  | -13.34457 | 0.256032  |
| AGT | 227374 | 205691 | 203839 | 636904  | ACT    | 219928 | 228076 | 186992 | 634996  | 3.329294  | -10.32121 | 8.621118  | 0.300024  |
| ATA | 89947  | 156384 | 120060 | 366391  | TAT    | 169754 | 67046  | 128749 | 365549  | -61.46068 | 79.96957  | -6.984474 | 0.230074  |
| ATC | 192372 | 209902 | 222402 | 624676  | GAT    | 250718 | 92372  | 285647 | 628737  | -26.33596 | 77.76388  | -24.8972  | -0.647991 |
| ATG | 231587 | 430648 | 118907 | 781142  | CAT    | 299586 | 102800 | 373594 | 775980  | -25.60333 | 122.9166  | -103.426  | 0.663018  |
| ATT | 175370 | 145310 | 183075 | 503755  | AAT    | 186951 | 125714 | 192836 | 505501  | -6.392674 | 14.46071  | -5.193251 | -0.345997 |
| CAA | 262903 | 132055 | 341038 | 735996  | TTG    | 194325 | 409881 | 130920 | 735126  | 29.99729  | -102.5309 | 89.04097  | 0.118277  |
| CAC | 257621 | 170022 | 372391 | 800034  | GTG    | 310180 | 308444 | 179151 | 797775  | -18.51318 | -57.86075 | 70.07263  | 0.282762  |
| CAG | 496321 | 335065 | 477100 | 1308486 | CTG    | 499766 | 418075 | 386294 | 1304135 | -0.691707 | -22.04371 | 21.03466  | 0.333075  |
| CAT | 299586 | 102800 | 373594 | 775980  | ATG    | 231587 | 430648 | 118907 | 781142  | 25.60333  | -122.9166 | 103.426   | -0.663018 |
| CCA | 419518 | 405231 | 272622 | 1097371 | TGG    | 320333 | 468290 | 310255 | 1098878 | 26.81216  | -14.43789 | -12.91284 | -0.137234 |
| CCC | 248709 | 276150 | 252201 | 777060  | GGG    | 267791 | 252806 | 258517 | 779114  | -7.388964 | 8.826443  | -2.473381 | -0.263981 |
| CCG | 116844 | 132899 | 168650 | 418393  | CGG    | 150998 | 159800 | 106857 | 417655  | -25.5031  | -18.38134 | 44.85766  | 0.176545  |
| CCT | 394038 | 260715 | 296254 | 951007  | AGG    | 238408 | 455844 | 259193 | 953445  | 49.21527  | -54.46279 | 13.34457  | -0.256032 |
| CGA | 108862 | 73202  | 120096 | 302160  | TCG    | 60215  | 143861 | 96934  | 301010  | 57.5442   | -65.1046  | 21.34451  | 0.381319  |
| CGC | 126240 | 113586 | 104591 | 344417  | GCG    | 95973  | 114009 | 134113 | 344095  | 27.24143  | -0.371713 | -24.73524 | 0.093535  |
| CGG | 150998 | 159800 | 106857 | 417655  | CCG    | 116844 | 132899 | 168650 | 418393  | 25.5031   | 18.38134  | -44.85766 | -0.176545 |
| CGT | 112266 | 57886  | 103449 | 273601  | ACG    | 69411  | 138253 | 66671  | 274335  | 47.17713  | -81.94903 | 43.23771  | -0.267915 |

|     |        |        |        |             |        |        |        |         |           |           |           |           |
|-----|--------|--------|--------|-------------|--------|--------|--------|---------|-----------|-----------|-----------|-----------|
| CTA | 137579 | 120099 | 89195  | 346873 TAG  | 76060  | 165820 | 107114 | 348994  | 57.59154  | -31.98179 | -18.25591 | -0.609599 |
| CTC | 250340 | 255153 | 449442 | 954935 GAG  | 435955 | 251436 | 270840 | 958231  | -54.0919  | 1.467462  | 49.59224  | -0.34456  |
| CTG | 499766 | 418075 | 386294 | 1304135 CAG | 496321 | 335065 | 477100 | 1308486 | 0.691707  | 22.04371  | -21.03466 | -0.333075 |
| CTT | 297688 | 163540 | 427597 | 888825 AAG  | 337626 | 376271 | 181886 | 895783  | -12.57268 | -78.81685 | 80.62932  | -0.779779 |
| GAA | 328491 | 167532 | 382389 | 878412 TTC  | 228489 | 333895 | 307656 | 870040  | 35.90865  | -66.35582 | 21.66033  | 0.957647  |
| GAC | 263132 | 143667 | 220440 | 627239 GTC  | 165624 | 174334 | 286963 | 626921  | 45.48414  | -19.28736 | -26.22097 | 0.050711  |
| GAG | 435955 | 251436 | 270840 | 958231 CTC  | 250340 | 255153 | 449442 | 954935  | 54.0919   | -1.467462 | -49.59224 | 0.34456   |
| GAT | 250718 | 92372  | 285647 | 628737 ATC  | 192372 | 209902 | 222402 | 624676  | 26.33596  | -77.76388 | 24.8972   | 0.647991  |
| GCA | 303381 | 313588 | 244644 | 861613 TGC  | 243335 | 338058 | 280988 | 862381  | 21.96607  | -7.510213 | -13.82869 | -0.089095 |
| GCC | 286872 | 303961 | 285153 | 875986 GGC  | 289191 | 222170 | 361224 | 872585  | -0.80512  | 31.0915   | -23.53766 | 0.389003  |
| GCG | 95973  | 114009 | 134113 | 344095 CGC  | 126240 | 113586 | 104591 | 344417  | -27.24143 | 0.371713  | 24.73524  | -0.093535 |
| GCT | 362009 | 242737 | 334598 | 939344 AGC  | 265467 | 393379 | 282809 | 941655  | 30.77154  | -47.36306 | 16.77629  | -0.24572  |
| GGA | 292830 | 227546 | 430928 | 951304 TCC  | 251054 | 460624 | 236766 | 948444  | 15.3621   | -67.73849 | 58.15898  | 0.301093  |
| GGC | 289191 | 222170 | 361224 | 872585 GCC  | 286872 | 303961 | 285153 | 875986  | 0.80512   | -31.0915  | 23.53766  | -0.389003 |
| GGG | 267791 | 252806 | 258517 | 779114 CCC  | 248709 | 276150 | 252201 | 777060  | 7.388964  | -8.826443 | 2.473381  | 0.263981  |
| GGT | 247829 | 128831 | 269429 | 646089 ACC  | 182068 | 293952 | 166321 | 642341  | 30.59384  | -78.11147 | 47.32438  | 0.581793  |
| GTA | 108176 | 111257 | 165817 | 385250 TAC  | 163102 | 102496 | 117207 | 382805  | -40.49425 | 8.197312  | 34.35044  | 0.636673  |
| GTC | 165624 | 174334 | 286963 | 626921 GAC  | 263132 | 143667 | 220440 | 627239  | -45.48414 | 19.28736  | 26.22097  | -0.050711 |
| GTG | 310180 | 308444 | 179151 | 797775 CAC  | 257621 | 170022 | 372391 | 800034  | 18.51318  | 57.86075  | -70.07263 | -0.282762 |
| GTT | 173596 | 113511 | 247008 | 534115 AAC  | 195794 | 191136 | 148747 | 535677  | -12.01873 | -50.96062 | 49.65749  | -0.292019 |
| TAA | 75854  | 101473 | 148968 | 326295 TTA  | 112767 | 167626 | 44736  | 325129  | -39.13986 | -49.16629 | 107.6199  | 0.357985  |
| TAC | 163102 | 102496 | 117207 | 382805 GTA  | 108176 | 111257 | 165817 | 385250  | 40.49425  | -8.197312 | -34.35044 | -0.636673 |
| TAG | 76060  | 165820 | 107114 | 348994 CTA  | 137579 | 120099 | 89195  | 346873  | -57.59154 | 31.98179  | 18.25591  | 0.609599  |
| TAT | 169754 | 67046  | 128749 | 365549 ATA  | 89947  | 156384 | 120060 | 366391  | 61.46068  | -79.96957 | 6.984474  | -0.230074 |
| TCA | 280717 | 464722 | 121992 | 867431 TGA  | 216306 | 299461 | 353683 | 869450  | 25.91872  | 43.25168  | -97.41567 | -0.232486 |
| TCC | 251054 | 460624 | 236766 | 948444 GGA  | 292830 | 227546 | 430928 | 951304  | -15.3621  | 67.73849  | -58.15898 | -0.301093 |
| TCG | 60215  | 143861 | 96934  | 301010 CGA  | 108862 | 73202  | 120096 | 302160  | -57.5442  | 65.1046   | -21.34451 | -0.381319 |
| TCT | 373572 | 380441 | 212335 | 966348 AGA  | 236931 | 368535 | 370900 | 976366  | 44.76342  | 3.179274  | -54.37431 | -1.031341 |
| TGA | 216306 | 299461 | 353683 | 869450 TCA  | 280717 | 464722 | 121992 | 867431  | -25.91872 | -43.25168 | 97.41567  | 0.232486  |
| TGC | 243335 | 338058 | 280988 | 862381 GCA  | 303381 | 313588 | 244644 | 861613  | -21.96607 | 7.510213  | 13.82869  | 0.089095  |
| TGG | 320333 | 468290 | 310255 | 1098878 CCA | 419518 | 405231 | 272622 | 1097371 | -26.81216 | 14.43789  | 12.91284  | 0.137234  |
| TGT | 288882 | 212122 | 286465 | 787469 ACA  | 234206 | 375873 | 184002 | 794081  | 20.90509  | -55.69809 | 43.558    | -0.836142 |
| TTA | 112767 | 167626 | 44736  | 325129 TAA  | 75854  | 101473 | 148968 | 326295  | 39.13986  | 49.16629  | -107.6199 | -0.357985 |
| TTC | 228489 | 333895 | 307656 | 870040 GAA  | 328491 | 167532 | 382389 | 878412  | -35.90865 | 66.35582  | -21.66033 | -0.957647 |

|     |        |        |        |            |        |        |        |        |           |          |           |           |
|-----|--------|--------|--------|------------|--------|--------|--------|--------|-----------|----------|-----------|-----------|
| TTG | 194325 | 409881 | 130920 | 735126 CAA | 262903 | 132055 | 341038 | 735996 | -29.99729 | 102.5309 | -89.04097 | -0.118277 |
| TTT | 253898 | 203274 | 268229 | 725401 AAA | 246485 | 227564 | 259556 | 733605 | 2.96293   | -11.2757 | 3.286566  | -1.124601 |

Supplementary Information Tables S4. Explanatory notes.

**Consensus coding sequence (CCDS) database presents CDS sequences data in fasta format like follows (two sample sequences):**

```
>CCDS1.1|Hs110|chr1
ATGTCCAAGGGGATCCTGCAGGTGCATCCTCCGATCTGCGACTGCCCGGGCTGCCGAATA
>CCDS2.2|Hs110|chr1
ATGGCAGCTGCGGGGAGCCGCAAGAGGCGCCTGGCGGAGCTGACGGTGGACGAGTTCCTA
```

**CCDS annotations on CDS sequences data include strand information like follows (for two sample sequences above):**

| #chromosome | nc_accession | gene      | gene_id | ccds_id | ccds_status | cds_strand | cds_from | cds_to | cds_locations   | match_type |
|-------------|--------------|-----------|---------|---------|-------------|------------|----------|--------|-----------------|------------|
| 1           | NC_000001.8  | LINC00115 | 79854   | CCDS1.1 | Public      | -          | 801942   | 802433 | [801942-802433] | Identical  |
| 1           | NC_000001.11 | SAMD11    | 148398  | CCDS2.2 | Public      | +          | 925941   | 944152 | [925941-926012] | Identical  |

**Mono-/di-/tri-nucleotides are counted at all possible positions of CDS, forming a statistics.**

**Mono-/di-/tri-nucleotides statistics computed for all codons for three codon positions, where possible, separately as well as in total.**

**For strand-independent case these statistics computed on CDS as they are given in CCDS fasta file, e.g. for two samples above:**

```
ATGTCCAAGGGGATCCTGCAGGTGCATCCTCCGATCTGCGACTGCCCGGGCTGCCGAATA
ATGGCAGCTGCGGGGAGCCGCAAGAGGCGCCTGGCGGAGCTGACGGTGGACGAGTTCCTA
```

**For strand-dependent case these statistics computed on CDS taking into account their strand: CDS on '-' strand reverse complemented**

**For two samples above sequences input sequences looks like (first sequence reverse complemented):**

```
TATTCGGCAGCCCGGGCAGTCGCAGATCGGAGGATGCACCTGCAGGATCCCCTTGGACAT
ATGGCAGCTGCGGGGAGCCGCAAGAGGCGCCTGGCGGAGCTGACGGTGGACGAGTTCCTA
```

**For reverse-complemented CDS codon positions keep original semantics, i.e. 1st and 3d codon positions are not interchanged**

**Mono-/di-/tri-nucleotides statistics collected and compared with reverse complementary counterparts for every codon position and in total.**

**To compare mono-/di-/tri-nucleotides counts we have used percentage difference formula  $200 \cdot (A-B)/(A+B)$ .**

**For two samples above mono- and di-nucleotides statistics with comparison presented below**

**Mononucleotide CDS counts, strand orientation not taken in account (strand-independent case)**

| SEQ | P1 | P2 | P3 | TOTAL | RC SEQ | P1 | P2 | P3 | TOTAL | diff P1 | diff P2  | diff P3 | diff     |         |
|-----|----|----|----|-------|--------|----|----|----|-------|---------|----------|---------|----------|---------|
| A   |    | 10 | 8  | 4     | 22 T   |    | 5  | 12 | 3     | 20      | 66.6667  | -40     | 28.5714  | 9.5238  |
| C   |    | 12 | 9  | 13    | 34 G   |    | 13 | 11 | 20    | 44      | -8       | -20     | -42.4242 | -25.641 |
| G   |    | 13 | 11 | 20    | 44 C   |    | 12 | 9  | 13    | 34      | 8        | 20      | 42.4242  | 25.641  |
| T   |    | 5  | 12 | 3     | 20 A   |    | 10 | 8  | 4     | 22      | -66.6667 | 40      | -28.5714 | -9.5238 |

**Mononucleotide Watson (+) strand counts, CDS on Crick (-) strand reverse complemented (strand-dependent case)**

| SEQ | P1 | P2 | P3 | TOTAL | RC SEQ | P1 | P2 | P3 | TOTAL | diff P1 | diff P2 | diff P3 | diff     |         |
|-----|----|----|----|-------|--------|----|----|----|-------|---------|---------|---------|----------|---------|
| A   |    | 9  | 10 | 4     | 23 T   |    | 6  | 10 | 3     | 19      | 40      | 0       | 28.5714  | 19.048  |
| C   |    | 9  | 11 | 13    | 33 G   |    | 16 | 9  | 20    | 45      | -56     | 20      | -42.4242 | -30.769 |
| G   |    | 16 | 9  | 20    | 45 C   |    | 9  | 11 | 13    | 33      | 56      | -20     | 42.4242  | 30.769  |
| T   |    | 6  | 10 | 3     | 19 A   |    | 9  | 10 | 4     | 23      | -40     | 0       | -28.5714 | -19.048 |

**Dinucleotide CDS counts, strand orientation not taken in account (strand-independent case)**

| SEQ | P1 | P2 | P3 | TOTAL | RC SEQ | P1 | P2 | P3 | TOTAL | diff-P1 | diff-P2  | diff-P3 | diff     |         |
|-----|----|----|----|-------|--------|----|----|----|-------|---------|----------|---------|----------|---------|
| AA  |    | 2  | 0  | 1     | 3 TT   |    | 1  | 0  | 0     | 1       | 66.6667  | #DIV/0! | 200      | 100     |
| AC  |    | 1  | 2  | 0     | 3 GT   |    | 2  | 0  | 2     | 4       | -66.6667 | 200     | -200     | -28.571 |
| AG  |    | 2  | 5  | 1     | 8 CT   |    | 4  | 2  | 3     | 9       | -66.6667 | 85.7143 | -100     | -11.765 |
| AT  |    | 5  | 1  | 0     | 6 AT   |    | 5  | 1  | 0     | 6       | 0        | 0       | #DIV/0!  | 0       |
| CA  |    | 2  | 1  | 2     | 5 TG   |    | 3  | 7  | 1     | 11      | -40      | -150    | 66.6667  | -75     |
| CC  |    | 3  | 1  | 6     | 10 GG  |    | 3  | 3  | 9     | 15      | 0        | -100    | -40      | -40     |
| CG  |    | 3  | 5  | 2     | 10 CG  |    | 3  | 5  | 2     | 10      | 0        | 0       | 0        | 0       |
| CT  |    | 4  | 2  | 3     | 9 AG   |    | 2  | 5  | 1     | 8       | 66.6667  | -85.714 | 100      | 11.765  |
| GA  |    | 4  | 1  | 5     | 10 TC  |    | 1  | 3  | 2     | 6       | 120      | -100    | 85.7143  | 50      |
| GC  |    | 4  | 7  | 4     | 15 GC  |    | 4  | 7  | 4     | 15      | 0        | 0       | 0        | 0       |
| GG  |    | 3  | 3  | 9     | 15 CC  |    | 3  | 1  | 6     | 10      | 0        | 100     | 40       | 40      |
| GT  |    | 2  | 0  | 2     | 4 AC   |    | 1  | 2  | 0     | 3       | 66.6667  | -200    | 200      | 28.571  |
| TA  |    | 0  | 2  | 0     | 2 TA   |    | 0  | 2  | 0     | 2       | #DIV/0!  | 0       | #DIV/0!  | 0       |
| TC  |    | 1  | 3  | 2     | 6 GA   |    | 4  | 1  | 5     | 10      | -120     | 100     | -85.7143 | -50     |
| TG  |    | 3  | 7  | 1     | 11 CA  |    | 2  | 1  | 2     | 5       | 40       | 150     | -66.6667 | 75      |
| TT  |    | 1  | 0  | 0     | 1 AA   |    | 2  | 0  | 1     | 3       | -66.6667 | #DIV/0! | -200     | -100    |

**Dinucleotide Watson (+) strand counts, CDS on Crick (-) strand reverse complemented (strand-dependent case)**

| SEQ | P1 | P2 | P3 | TOTAL | RC SEQ | P1 | P2 | P3 | TOTAL | diff-P1 | diff-P2  | diff-P3 | diff     |         |
|-----|----|----|----|-------|--------|----|----|----|-------|---------|----------|---------|----------|---------|
| AA  |    | 1  | 0  | 0     | 1 TT   |    | 2  | 1  | 0     | 3       | -66.6667 | -200    | #DIV/0!  | -100    |
| AC  |    | 2  | 2  | 0     | 4 GT   |    | 1  | 0  | 2     | 3       | 66.6667  | 200     | -200     | 28.571  |
| AG  |    | 5  | 4  | 2     | 11 CT  |    | 3  | 1  | 2     | 6       | 50       | 120     | 0        | 58.824  |
| AT  |    | 1  | 4  | 1     | 6 AT   |    | 1  | 4  | 1     | 6       | 0        | 0       | 0        | 0       |
| CA  |    | 0  | 4  | 4     | 8 TG   |    | 1  | 6  | 1     | 8       | -200     | -40     | 120      | 0       |
| CC  |    | 3  | 2  | 4     | 9 GG   |    | 4  | 5  | 7     | 16      | -28.5714 | -85.714 | -54.5455 | -56     |
| CG  |    | 3  | 4  | 3     | 10 CG  |    | 3  | 4  | 3     | 10      | 0        | 0       | 0        | 0       |
| CT  |    | 3  | 1  | 2     | 6 AG   |    | 5  | 4  | 2     | 11      | -50      | -120    | 0        | -58.824 |
| GA  |    | 5  | 1  | 5     | 11 TC  |    | 2  | 2  | 1     | 5       | 85.7143  | -66.667 | 133.333  | 75      |
| GC  |    | 6  | 3  | 6     | 15 GC  |    | 6  | 3  | 6     | 15      | 0        | 0       | 0        | 0       |
| GG  |    | 4  | 5  | 7     | 16 CC  |    | 3  | 2  | 4     | 9       | 28.5714  | 85.7143 | 54.5455  | 56      |
| GT  |    | 1  | 0  | 2     | 3 AC   |    | 2  | 2  | 0     | 4       | -66.6667 | -200    | 200      | -28.571 |
| TA  |    | 0  | 1  | 1     | 2 TA   |    | 0  | 1  | 1     | 2       | #DIV/0!  | 0       | 0        | 0       |
| TC  |    | 2  | 2  | 1     | 5 GA   |    | 5  | 1  | 5     | 11      | -85.7143 | 66.6667 | -133.333 | -75     |
| TG  |    | 1  | 6  | 1     | 8 CA   |    | 0  | 4  | 4     | 8       | 200      | 40      | -120     | 0       |
| TT  |    | 2  | 1  | 0     | 3 AA   |    | 1  | 0  | 0     | 1       | 66.6667  | 200     | #DIV/0!  | 100     |
